# Supplementary material for: Easy access to α-carbonyl sulfones using cross-coupling of α-aryl-α-diazoesters with sulfonyl hydrazides
Source: Royal Society of Chemistry journal article supplement (doi:10.1039/d2ob02219b), 2022-12-28

## **Supporting Information**

### **An easy access to $\alpha$ -carbonyl sulfones using cross-coupling of $\alpha$ -aryl- $\alpha$ -diazoesters with sulfonyl hydrazides**

Anup Kumar Sharma, Shiv Chand, Anand Kumar Pandey, and Krishna Nand Singh\*

Department of Chemistry, Institute of Science, Banaras Hindu University, Varanasi-221005,  
India.

E-mail: knsinghbhu@yahoo.co.in; knsingh@bhu.ac.in

| <b>Contents</b>                                                                             | <b>Page No.</b> |
|---------------------------------------------------------------------------------------------|-----------------|
| I. Copies of $^1\text{H}$ , $^{13}\text{C}\{^1\text{H}\}$ , and $^{19}\text{F}$ NMR spectra | S2-S28          |
| II. HRMS of the TEMPO adduct <b>4a</b>                                                      | S29             |

# I. Copies of $^1\text{H}$ , $^{13}\text{C}\{^1\text{H}\}$ , and $^{19}\text{F}$ NMR spectra

## $^1\text{H}$ NMR (500 MHz, $\text{CDCl}_3$ )

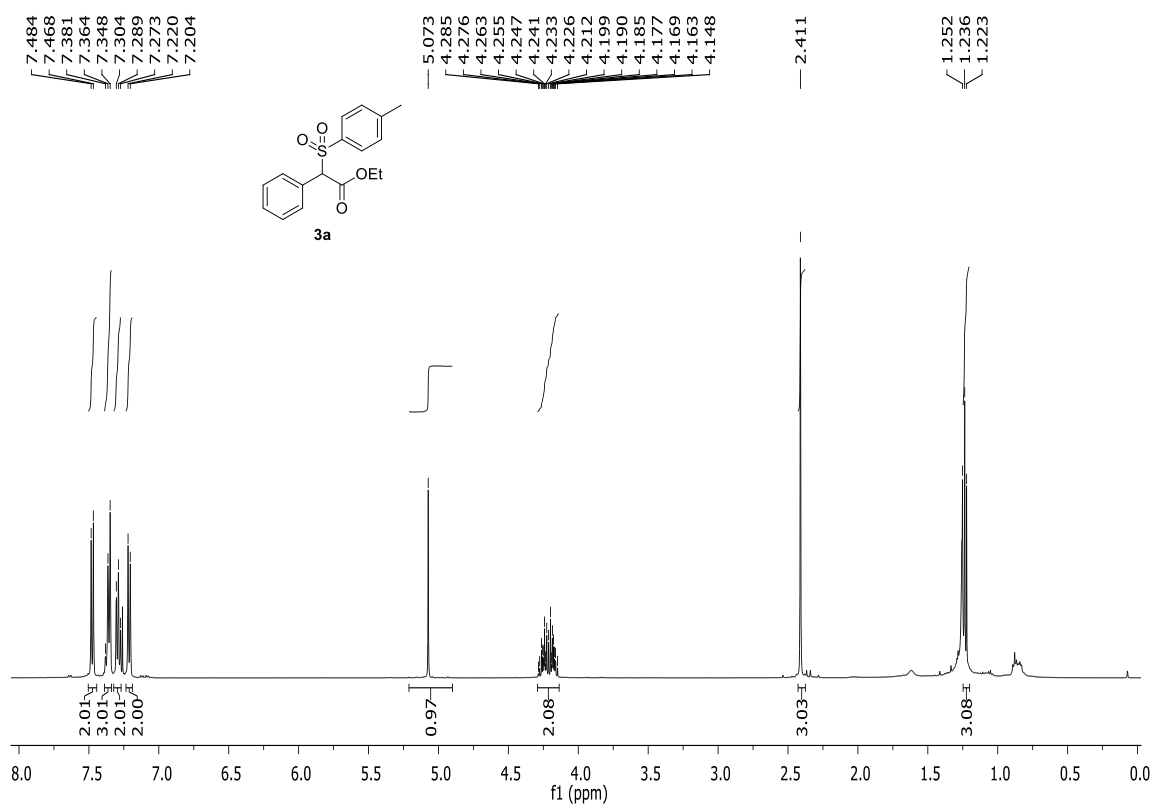

## $^{13}\text{C}\{^1\text{H}\}$ NMR (125 MHz, $\text{CDCl}_3$ )

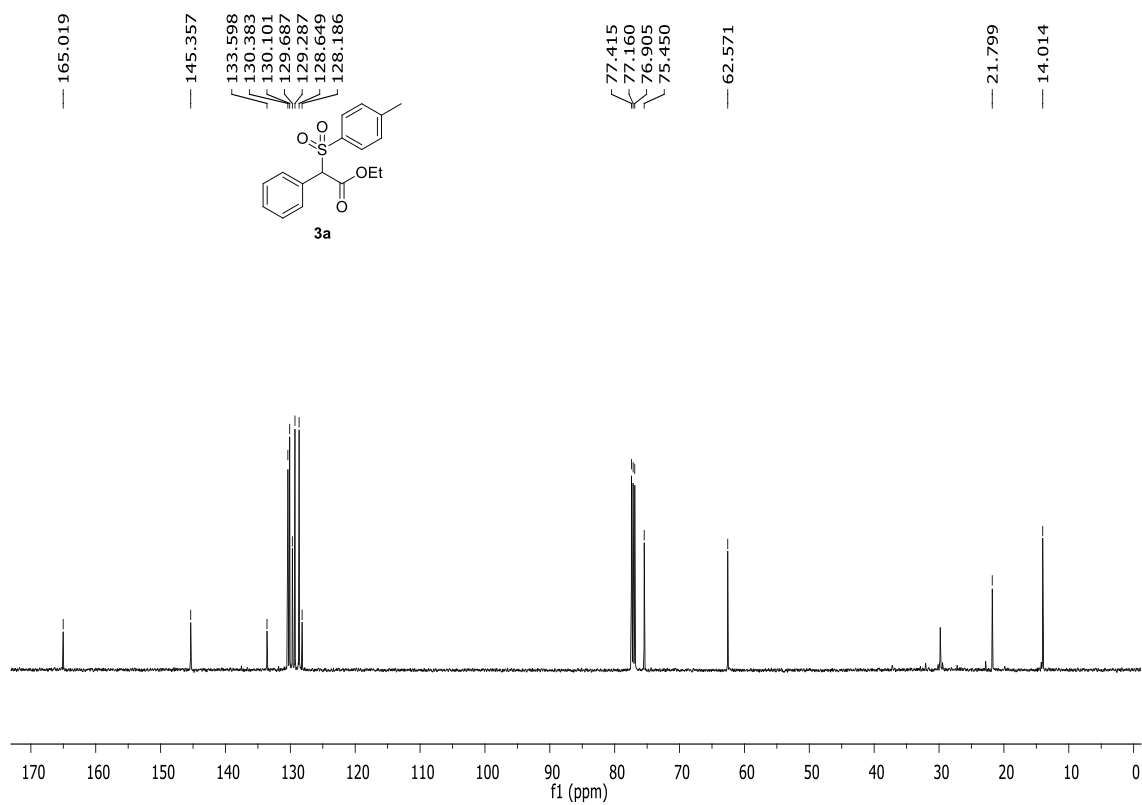

**$^1\text{H}$  NMR (500 MHz,  $\text{CDCl}_3$ )**

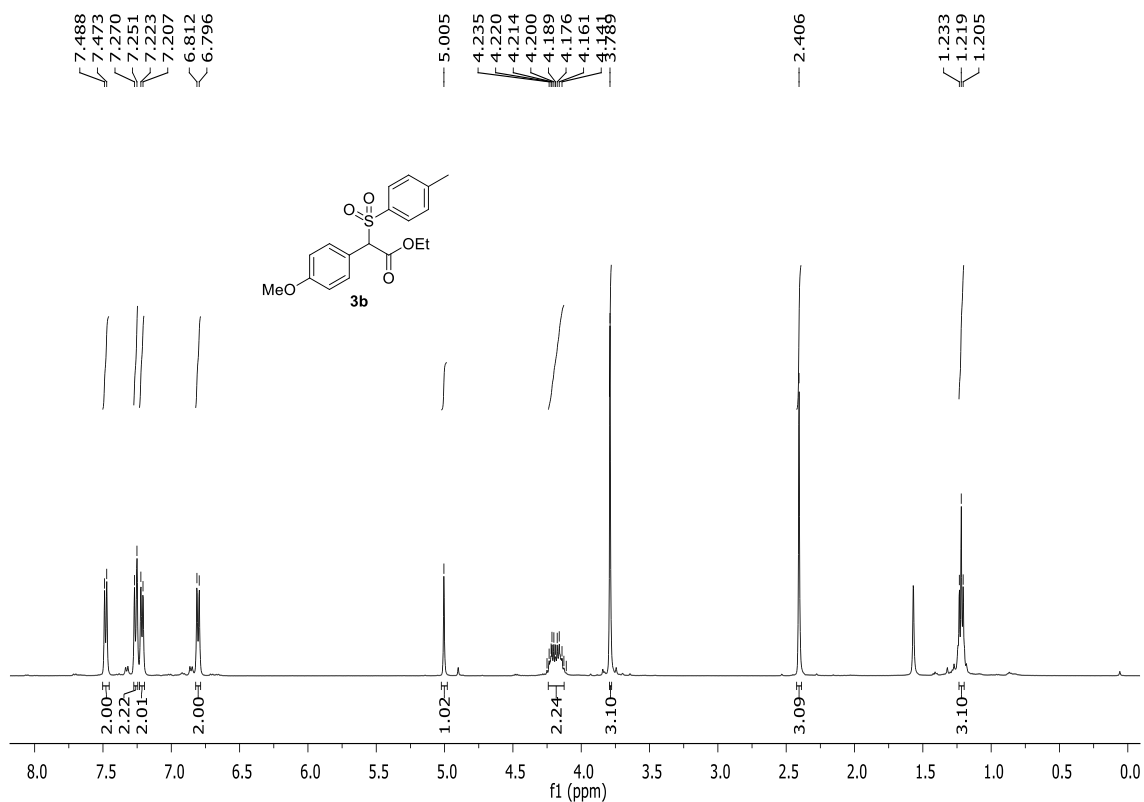

**$^{13}\text{C}\{^1\text{H}\}$  NMR (125 MHz,  $\text{CDCl}_3$ )**

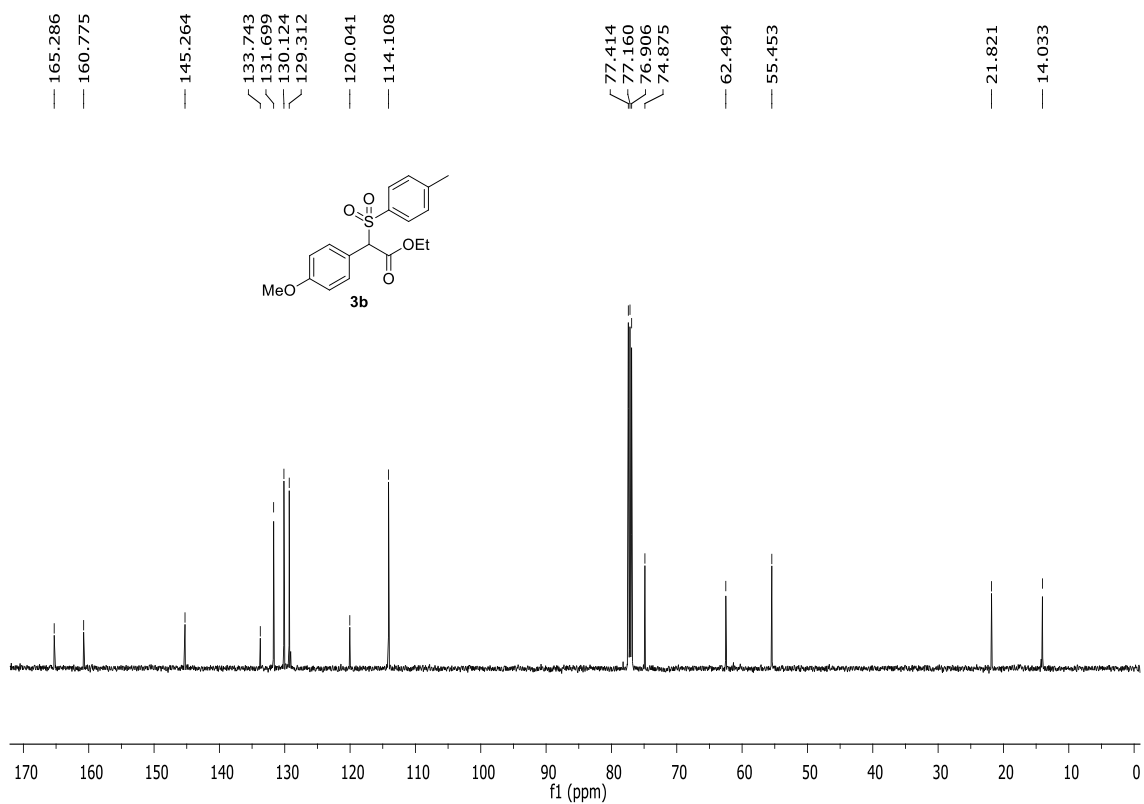

**<sup>1</sup>H NMR (500 MHz, CDCl<sub>3</sub>)**

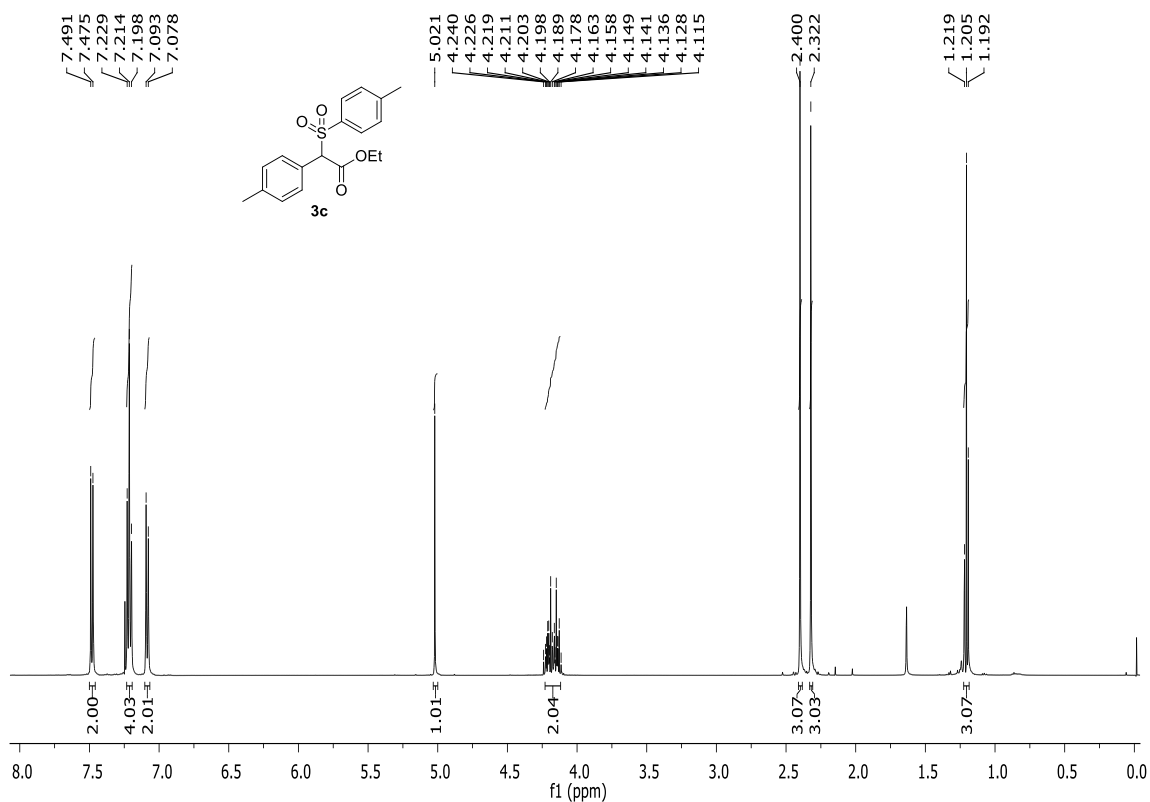

**<sup>13</sup>C{<sup>1</sup>H} NMR (125 MHz, CDCl<sub>3</sub>)**

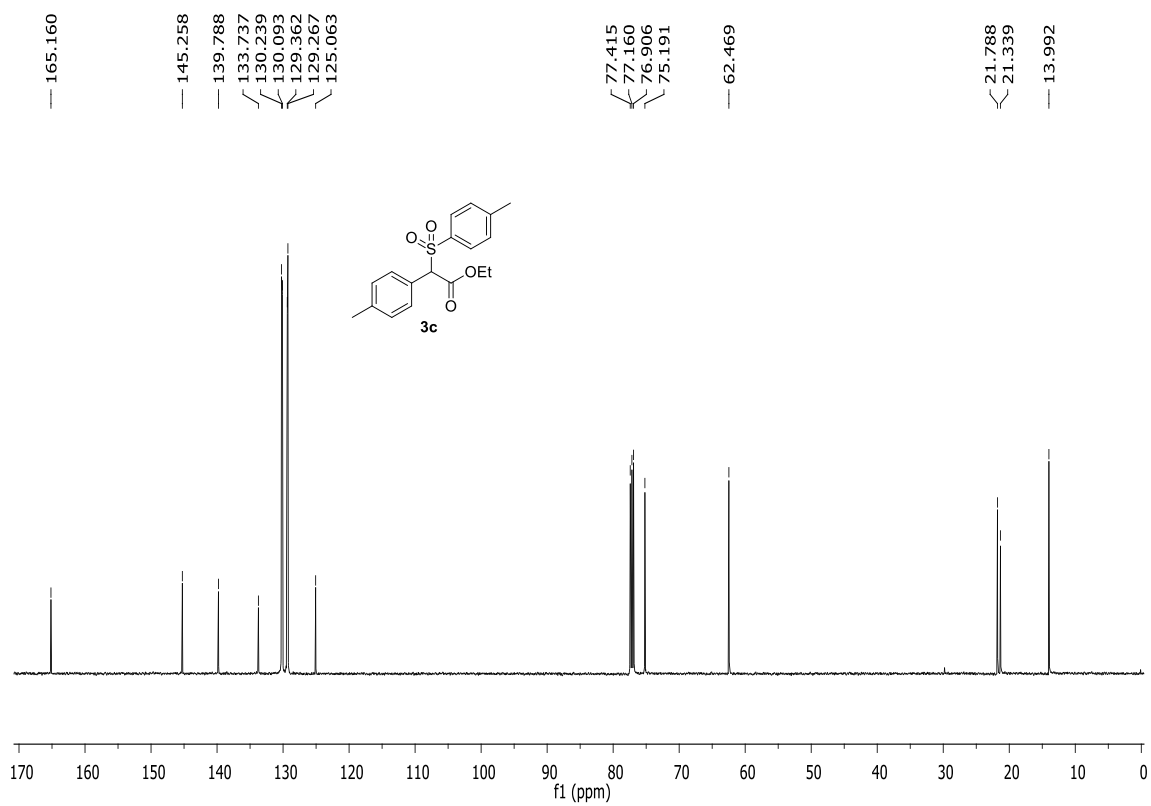

**<sup>1</sup>H NMR (500 MHz, CDCl<sub>3</sub>)**

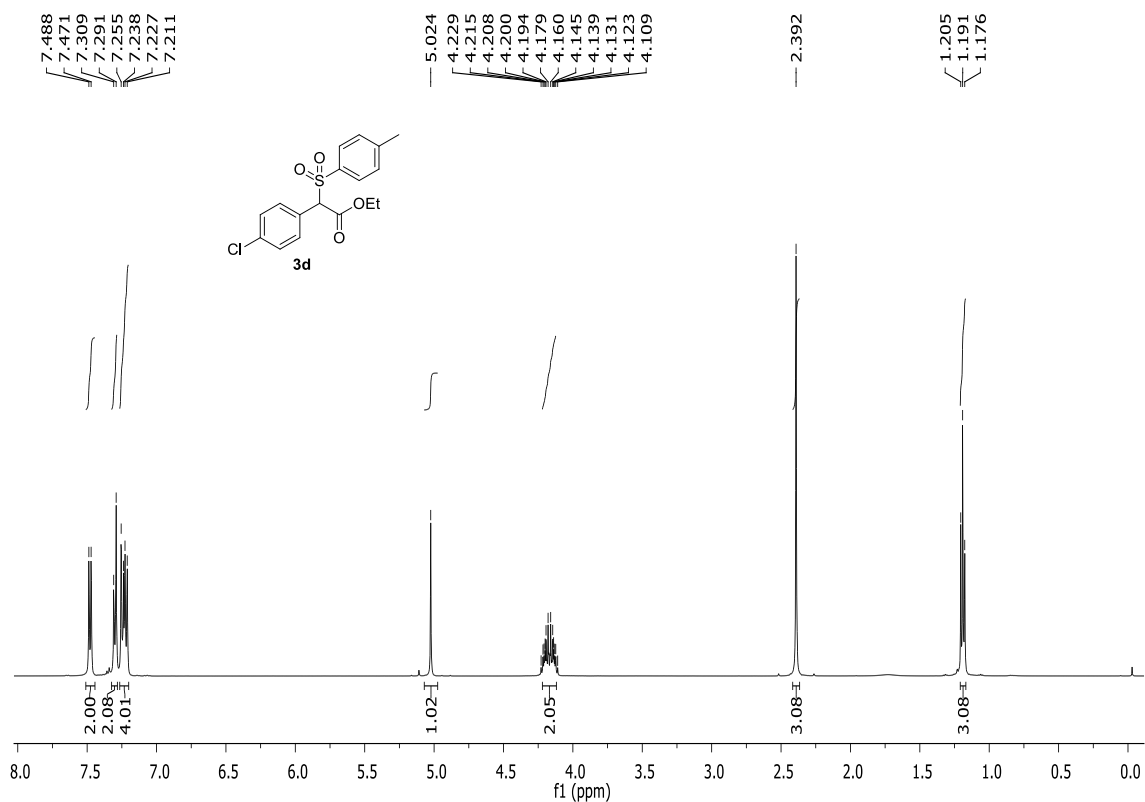

**<sup>13</sup>C{<sup>1</sup>H} NMR (125 MHz, CDCl<sub>3</sub>)**

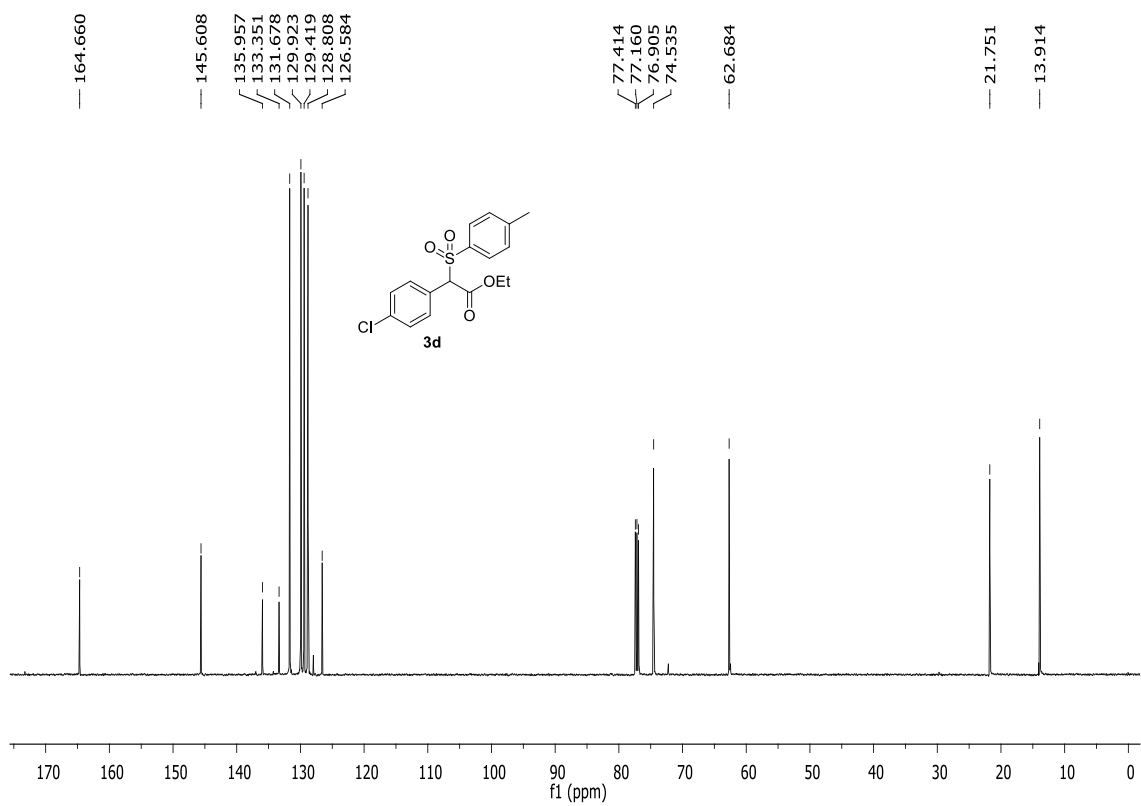

**<sup>1</sup>H NMR (500 MHz, CDCl<sub>3</sub>)**

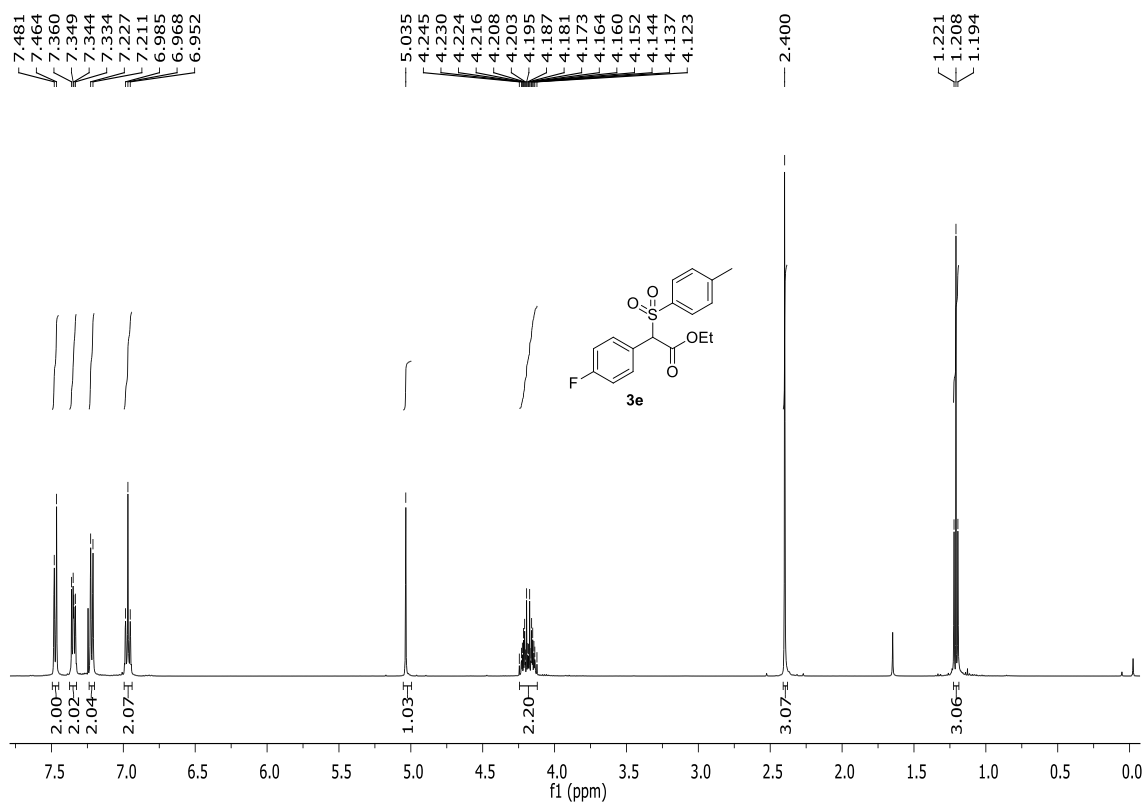

**<sup>13</sup>C{<sup>1</sup>H} NMR (125 MHz, CDCl<sub>3</sub>)**

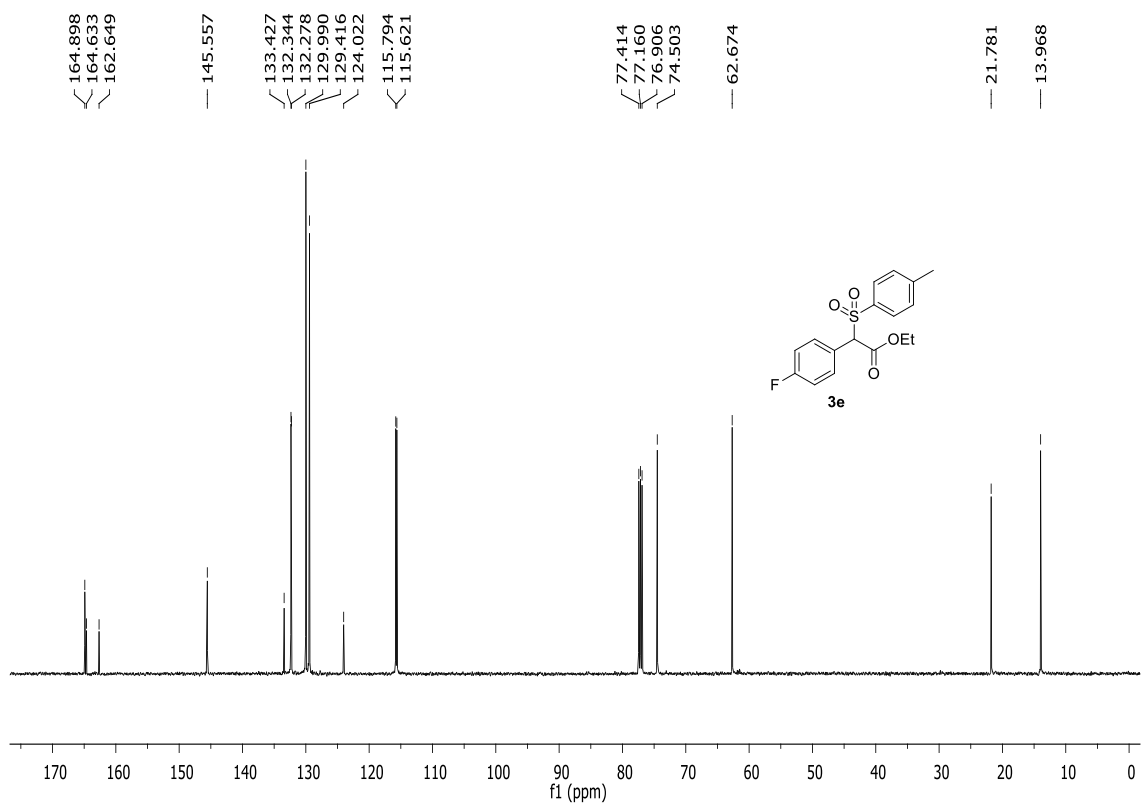

**$^{19}\text{F}$  NMR (470 MHz,  $\text{CDCl}_3$ )**

---111.082

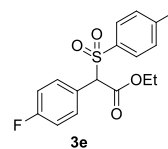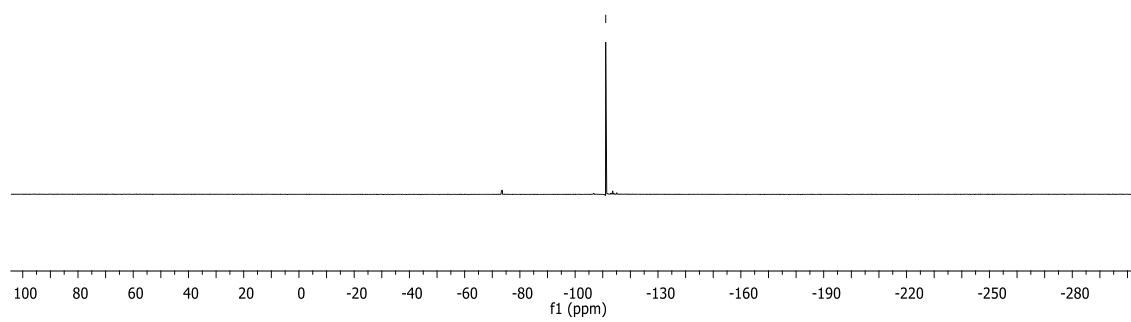

**<sup>1</sup>H NMR (500 MHz, CDCl<sub>3</sub>)**

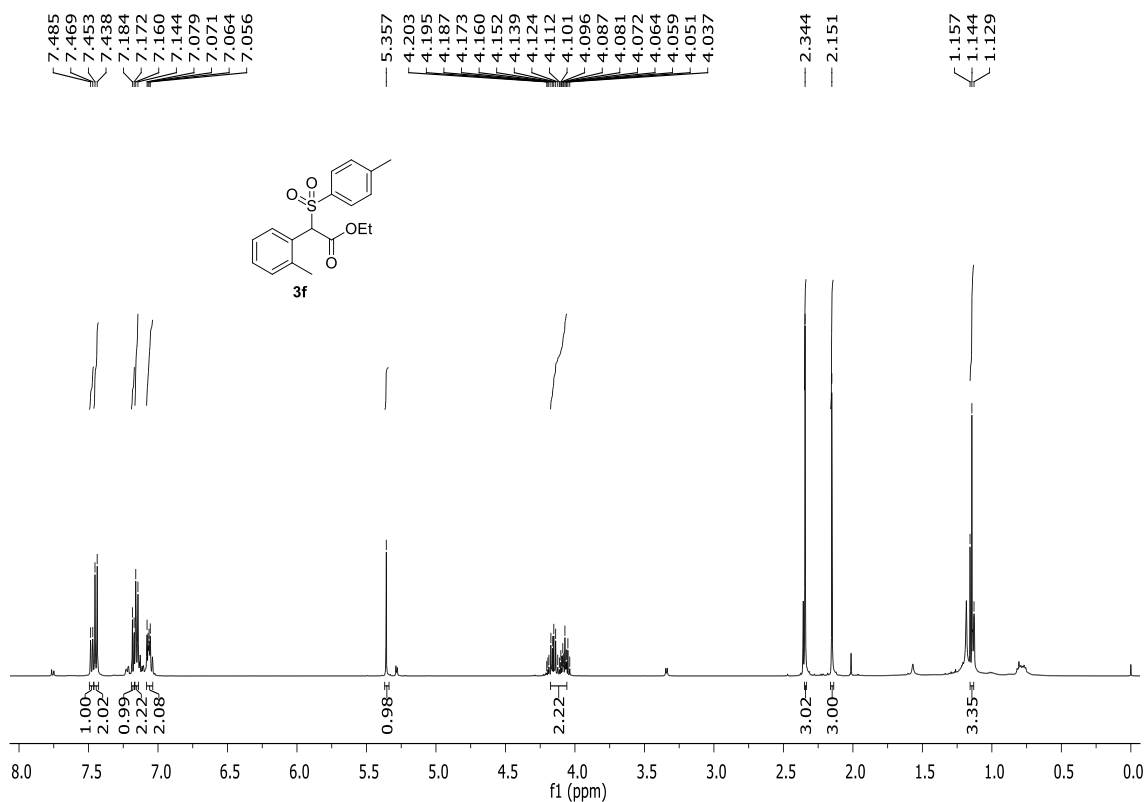

**<sup>13</sup>C{<sup>1</sup>H} NMR (125 MHz, CDCl<sub>3</sub>)**

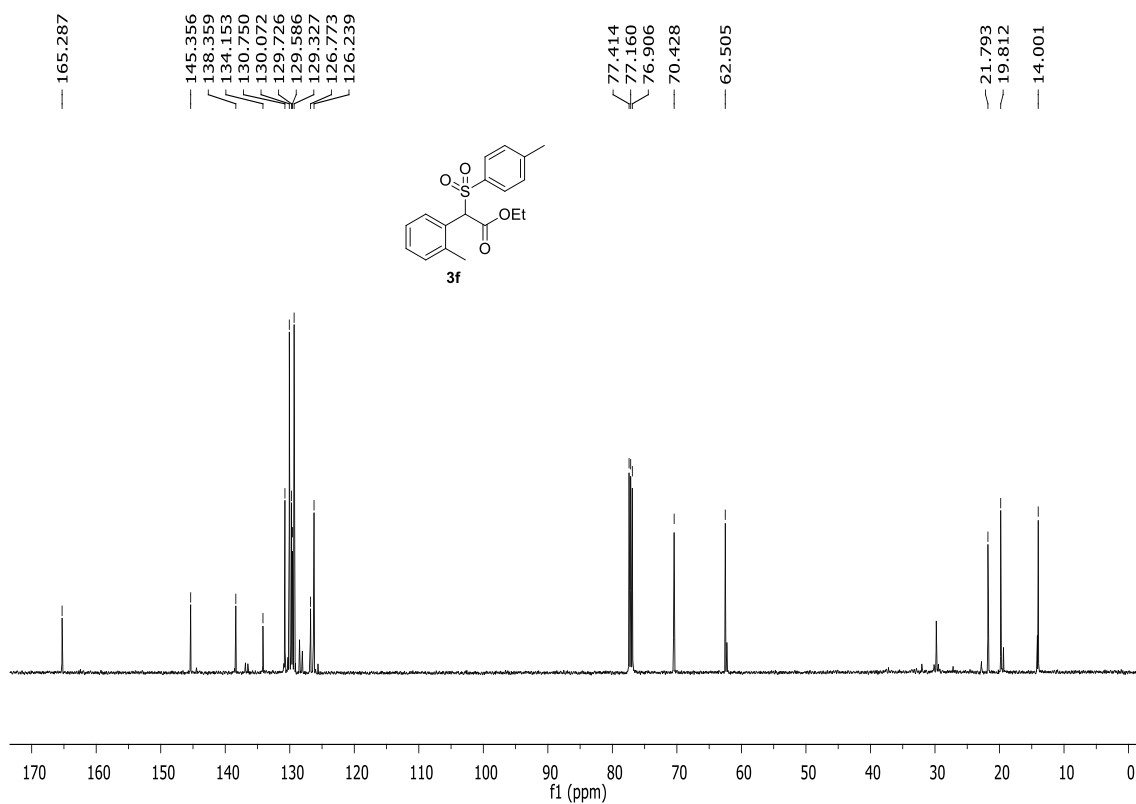



**<sup>1</sup>H NMR (500 MHz, CDCl<sub>3</sub>)**

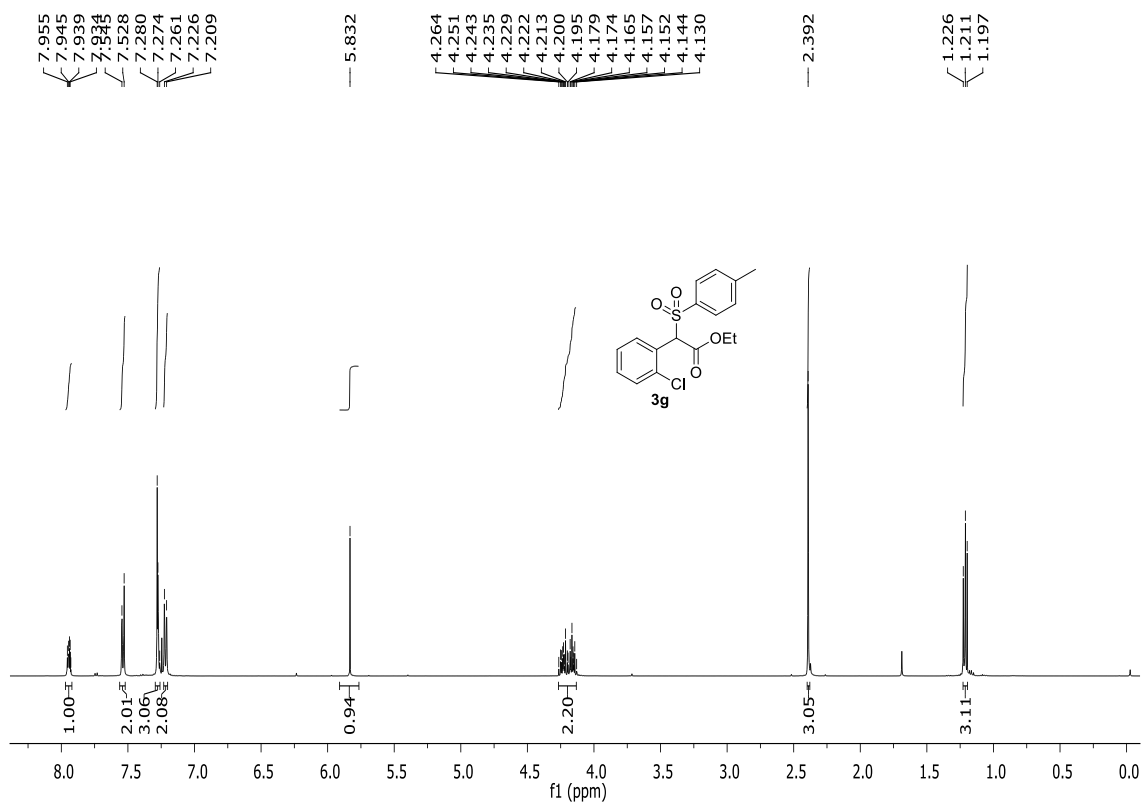

**<sup>13</sup>C{<sup>1</sup>H} NMR (125 MHz, CDCl<sub>3</sub>)**

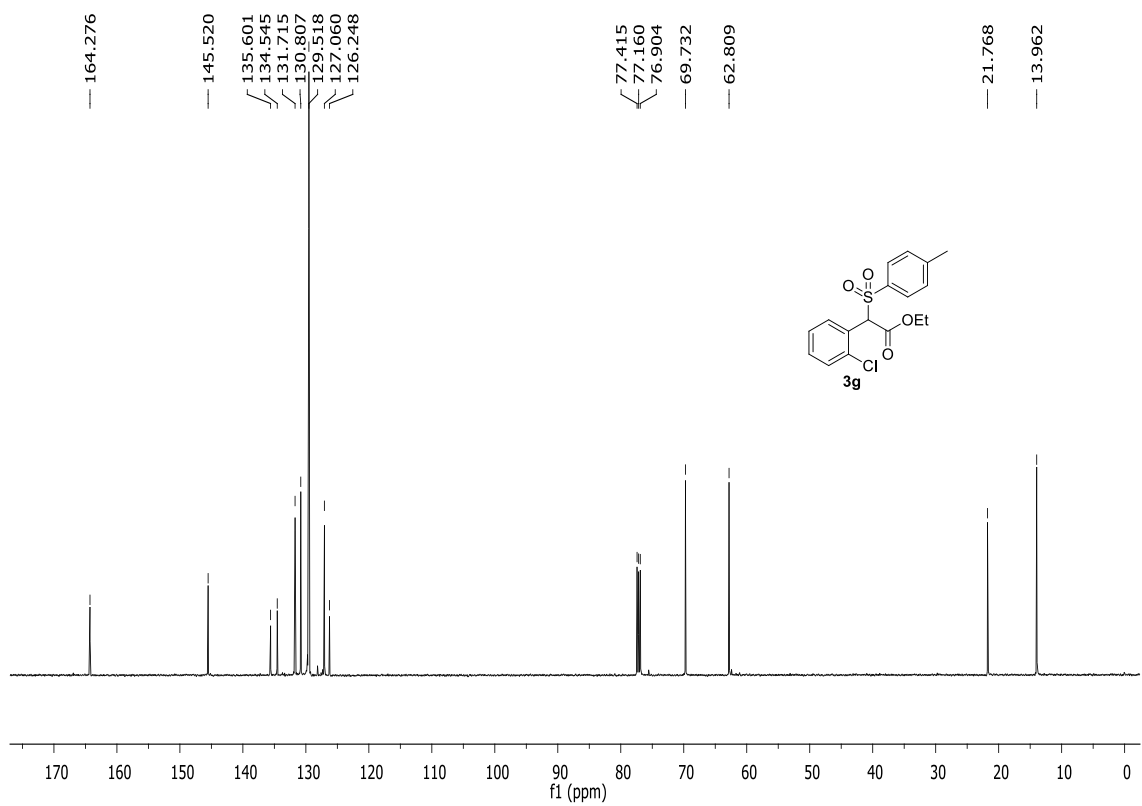

<sup>1</sup>H NMR (500 MHz, CDCl<sub>3</sub>)

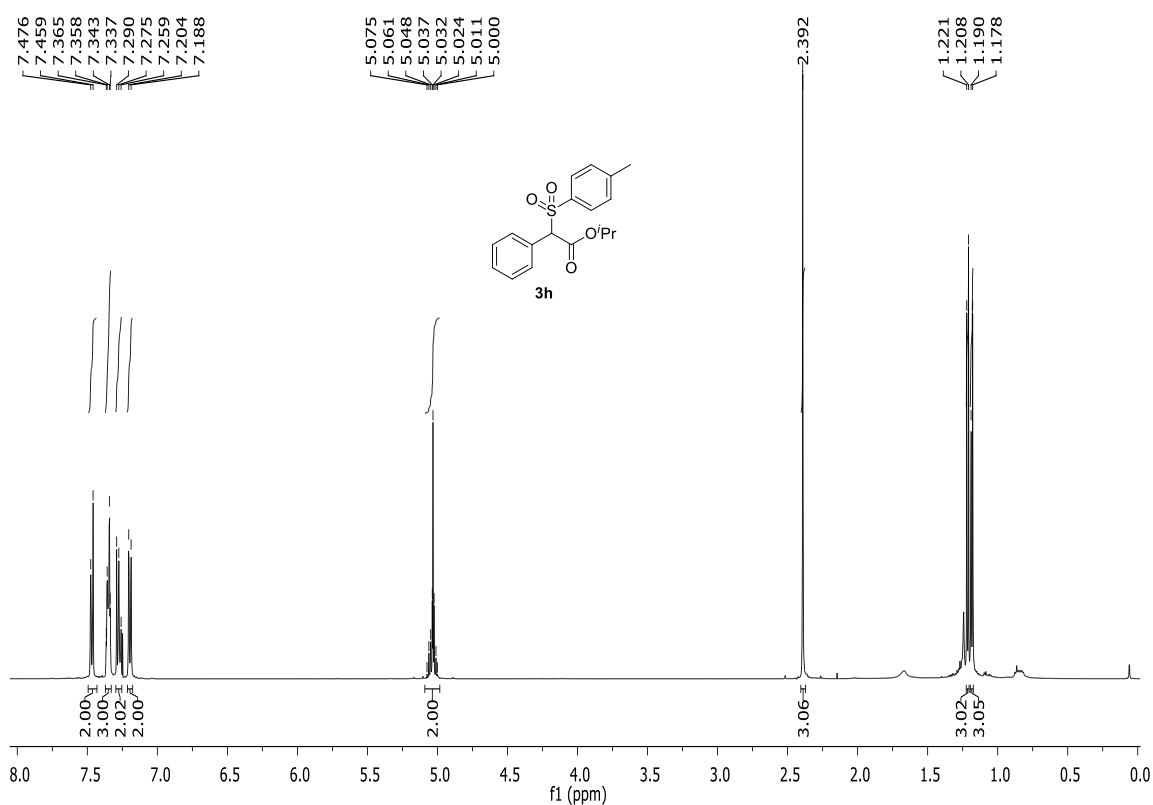

<sup>13</sup>C{<sup>1</sup>H} NMR (125 MHz, CDCl<sub>3</sub>)

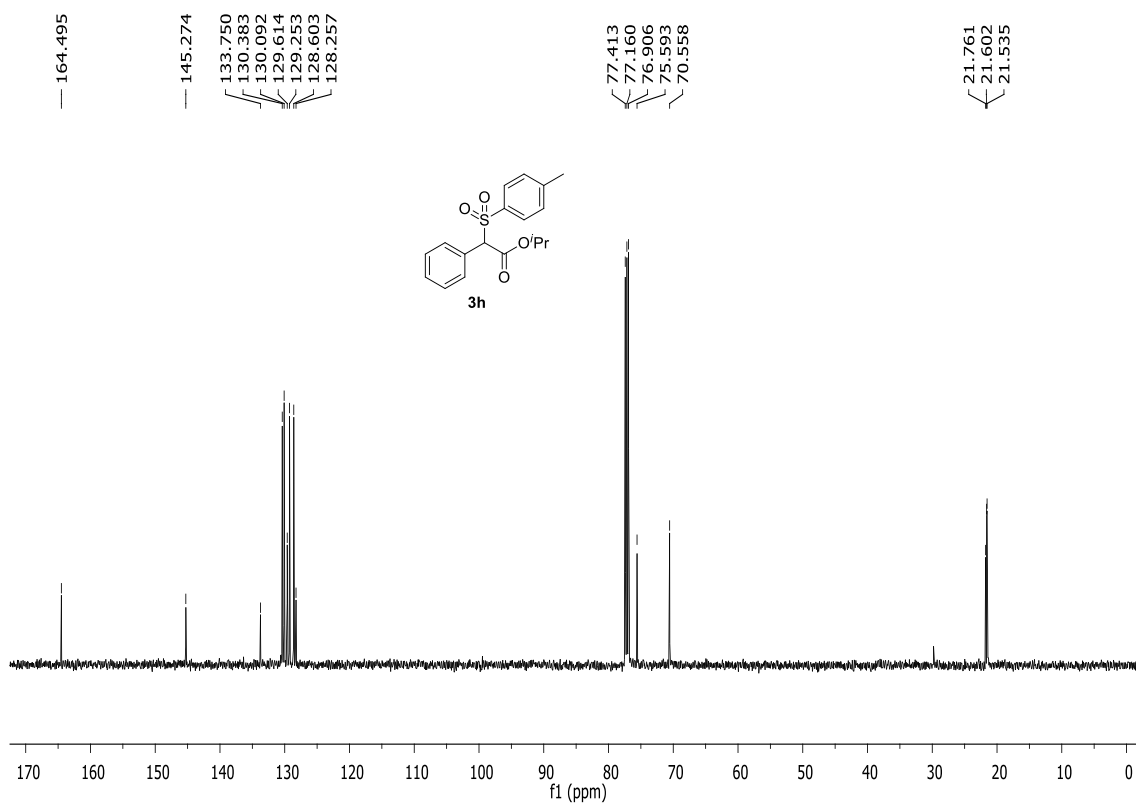

<sup>1</sup>H NMR (500 MHz, CDCl<sub>3</sub>)

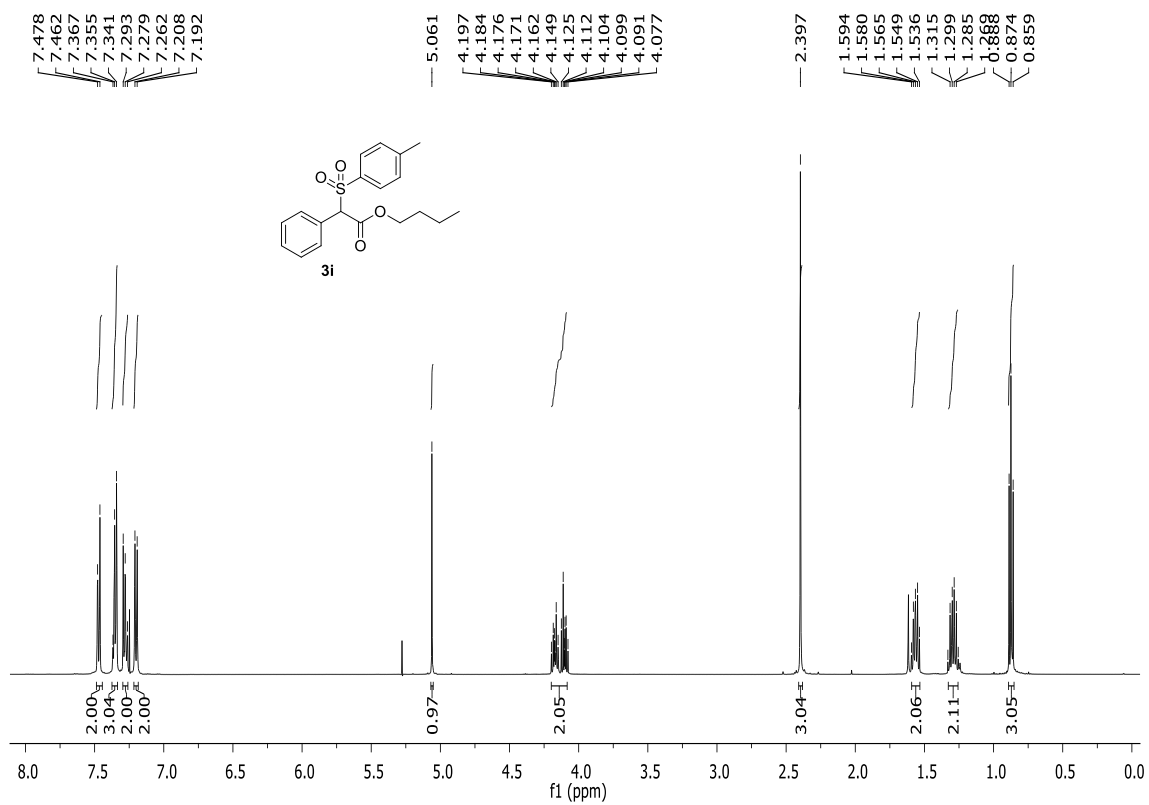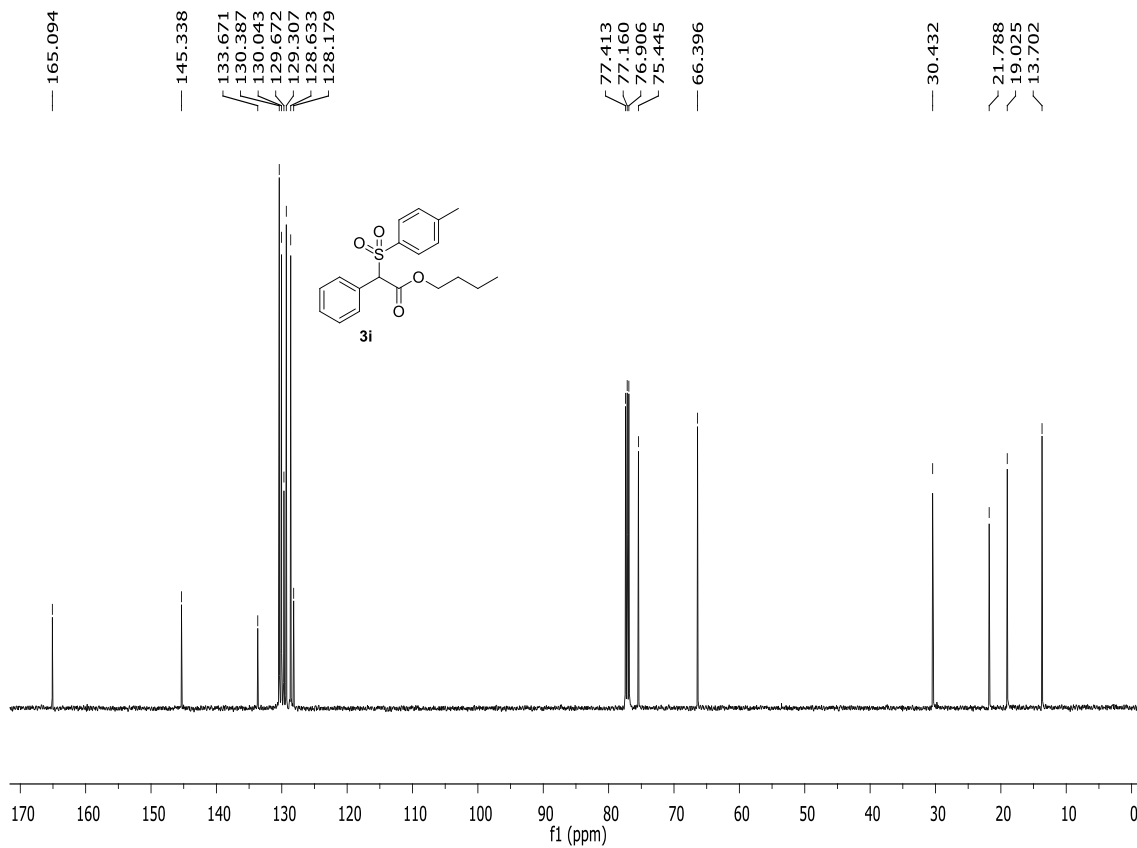

**<sup>1</sup>H NMR (500 MHz, CDCl<sub>3</sub>)**

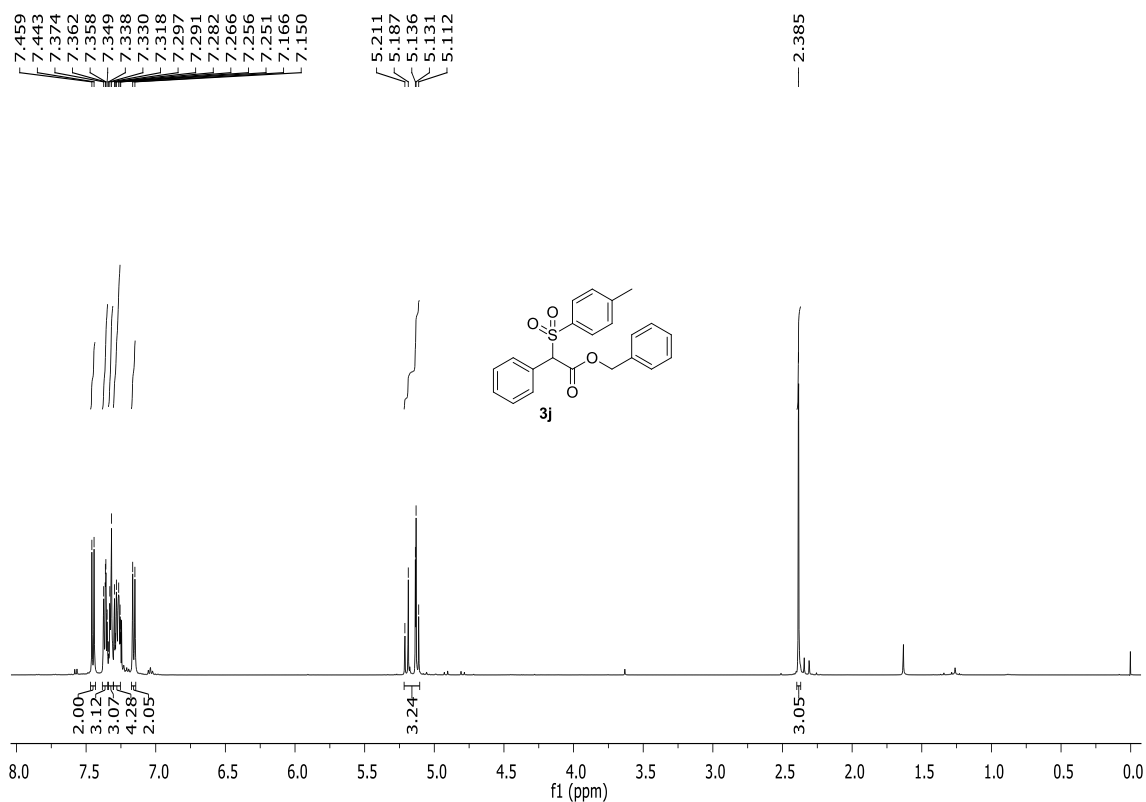

**<sup>13</sup>C{<sup>1</sup>H} NMR (125 MHz, CDCl<sub>3</sub>)**

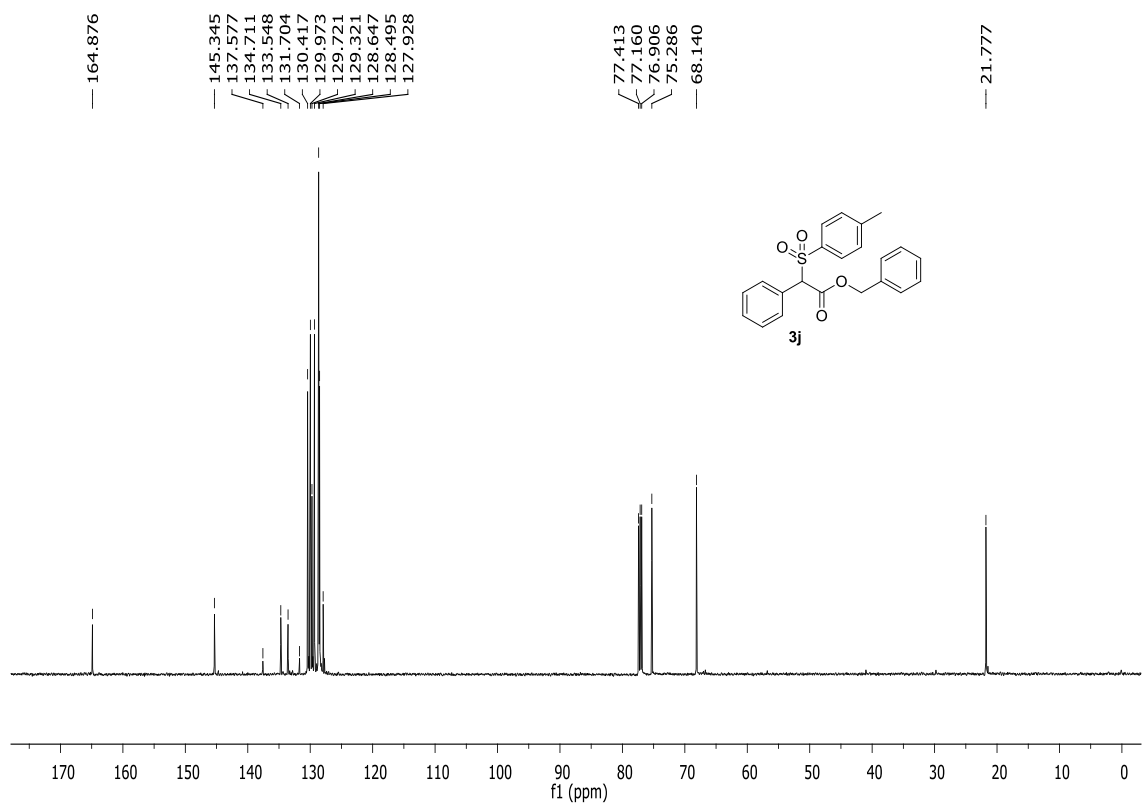

**$^1\text{H}$  NMR (500 MHz,  $\text{CDCl}_3$ )**

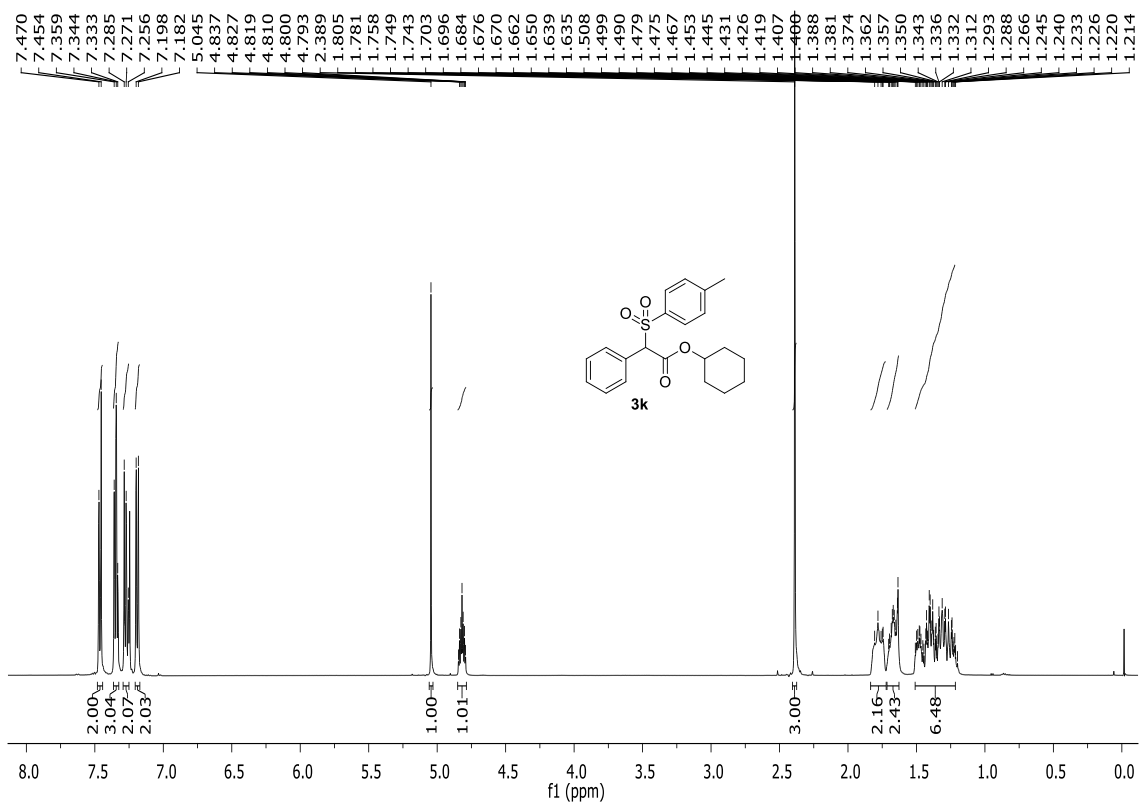

**$^{13}\text{C}\{^1\text{H}\}$  NMR (125 MHz,  $\text{CDCl}_3$ )**

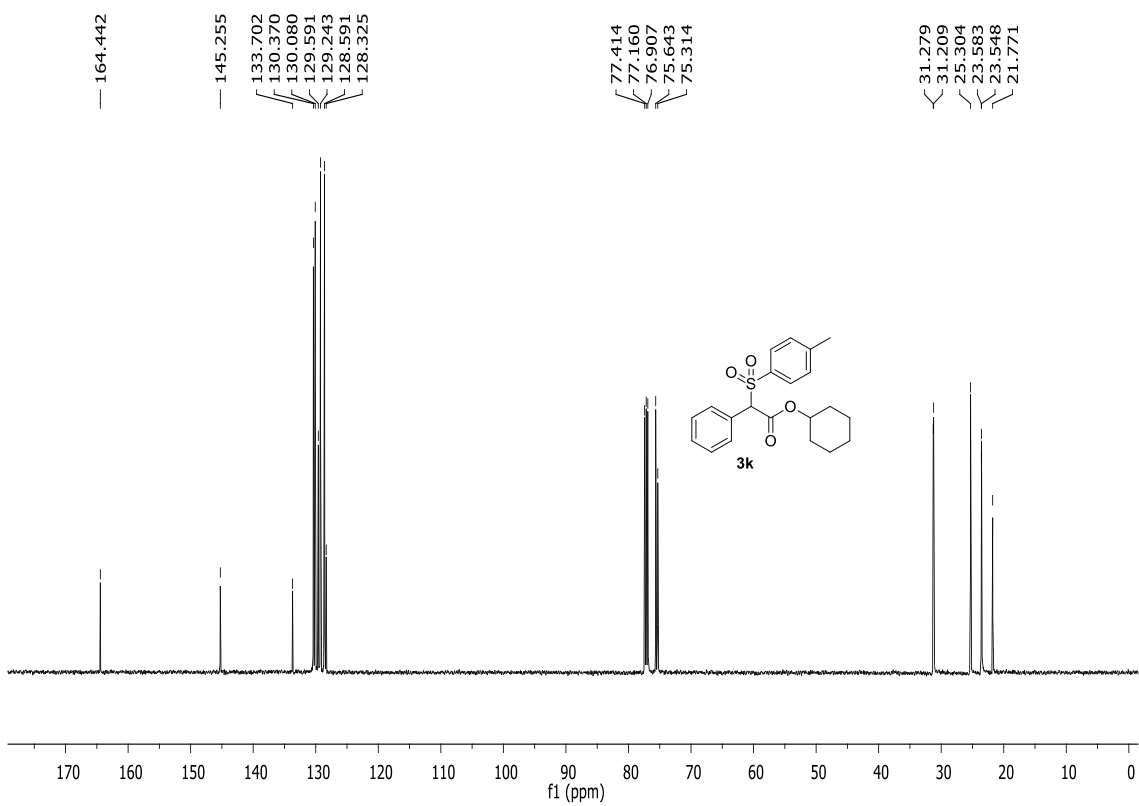

**$^1\text{H}$  NMR (500 MHz,  $\text{CDCl}_3$ )**

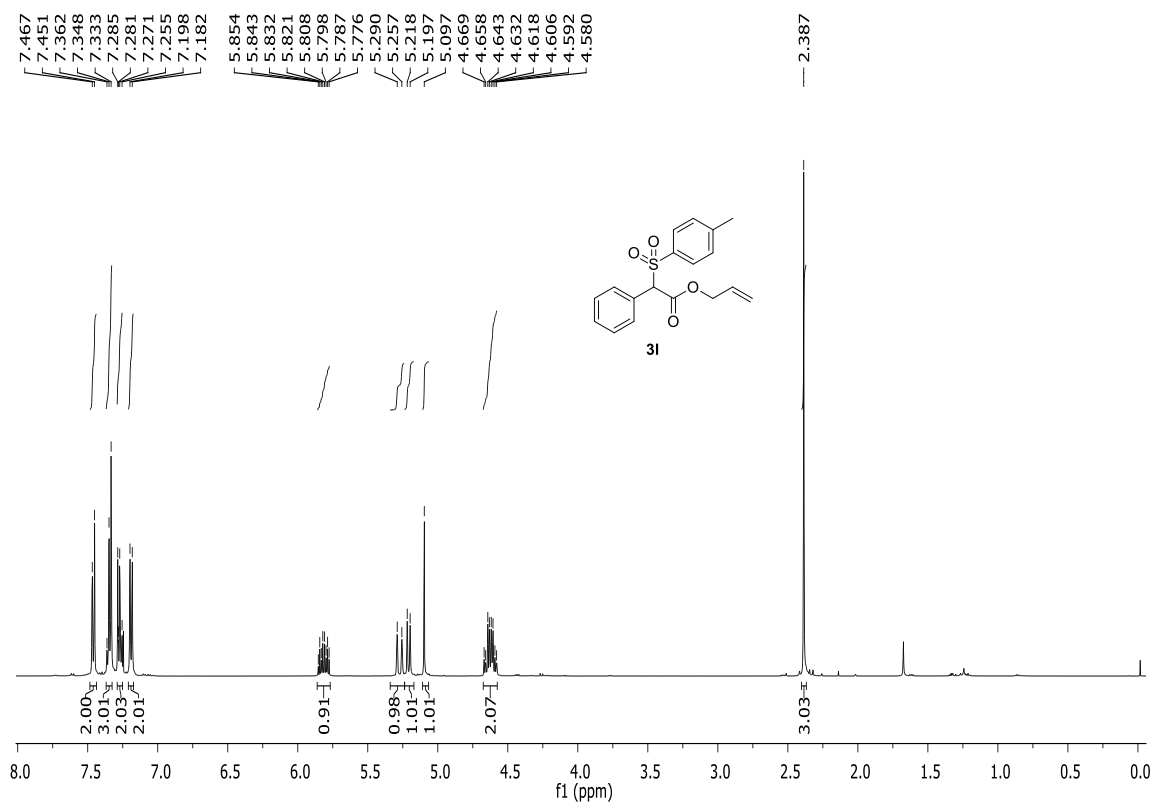

**$^{13}\text{C}\{^1\text{H}\}$  NMR (125 MHz,  $\text{CDCl}_3$ )**

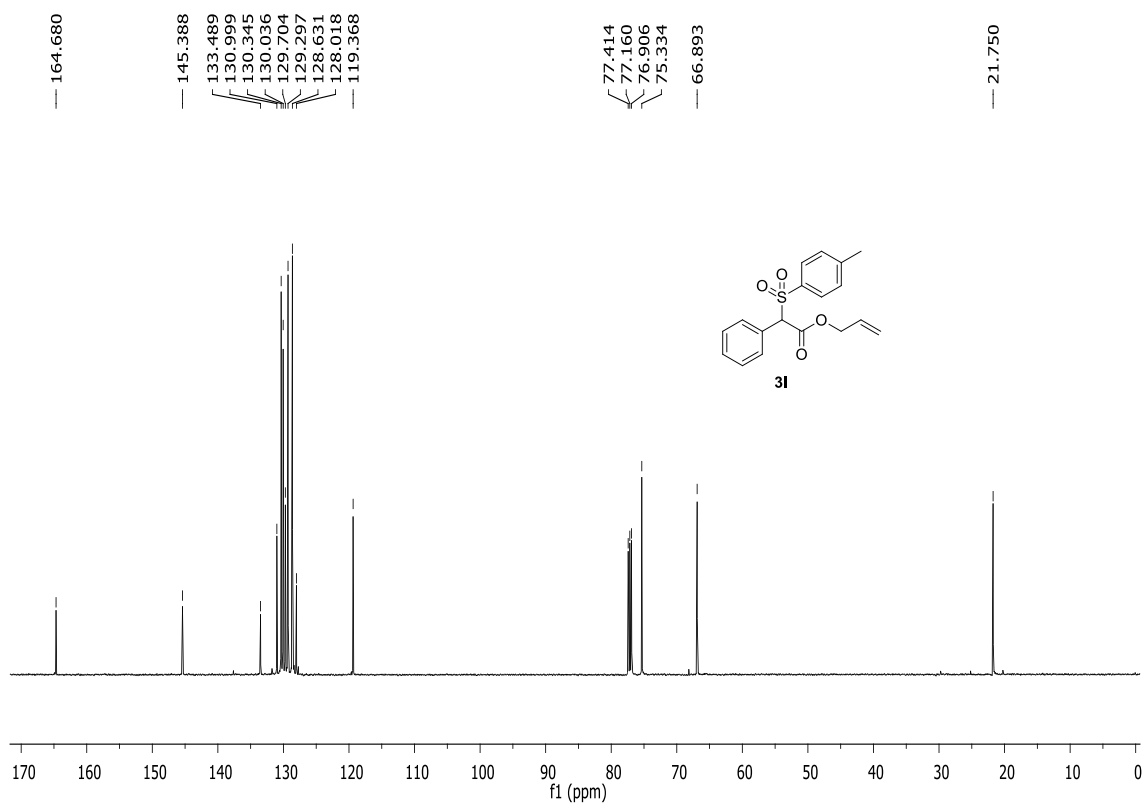

**$^1\text{H}$  NMR (500 MHz,  $\text{CDCl}_3$ )**

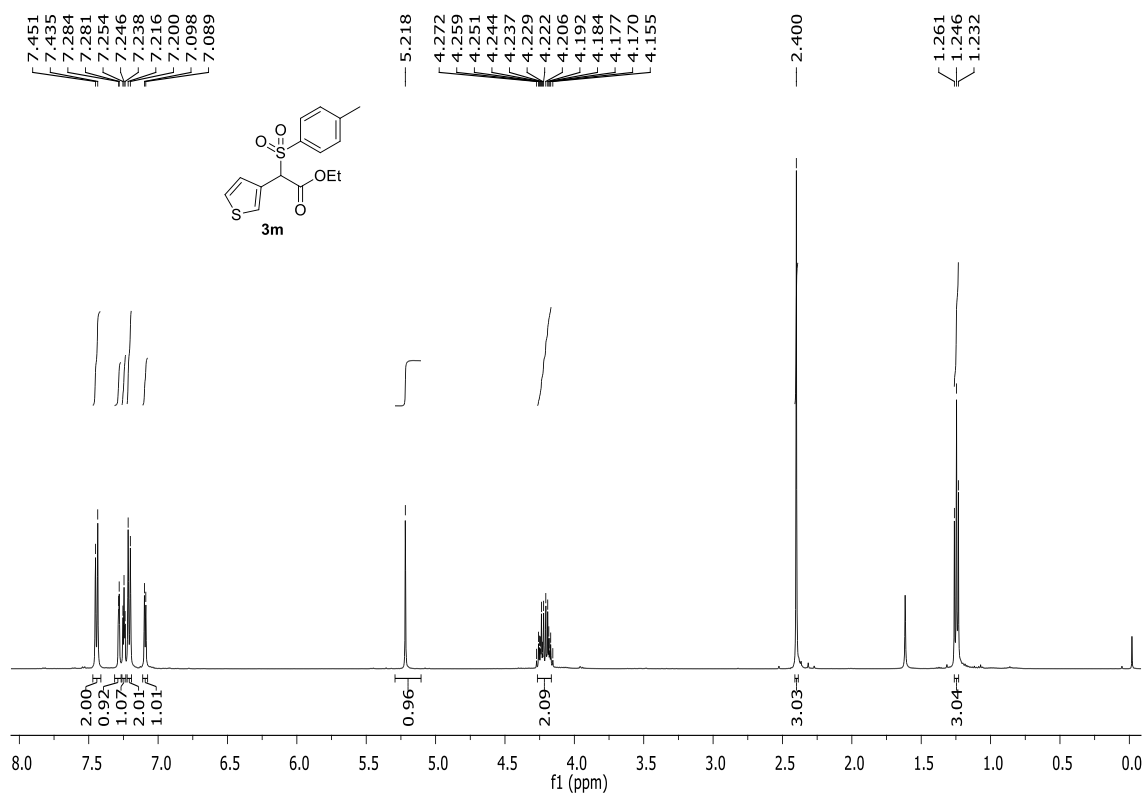

**$^{13}\text{C}\{^1\text{H}\}$  NMR (125 MHz,  $\text{CDCl}_3$ )**

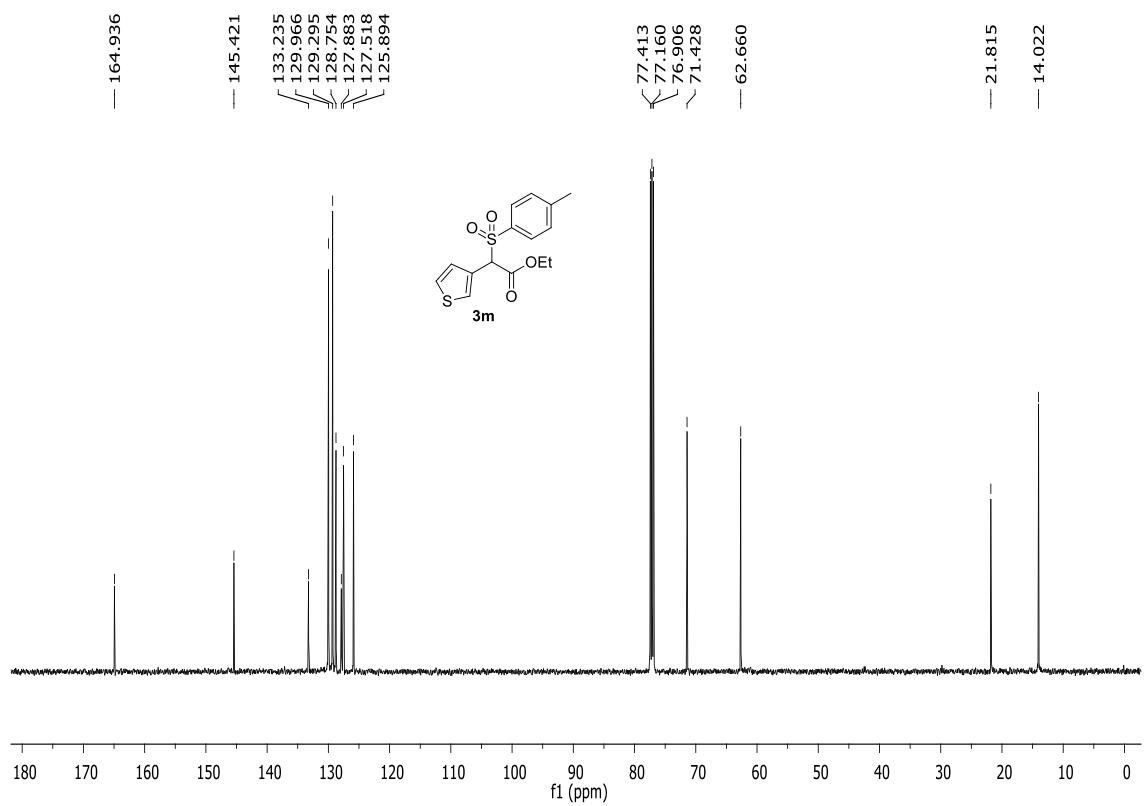

**$^1\text{H}$  NMR (500 MHz,  $\text{CDCl}_3$ )**

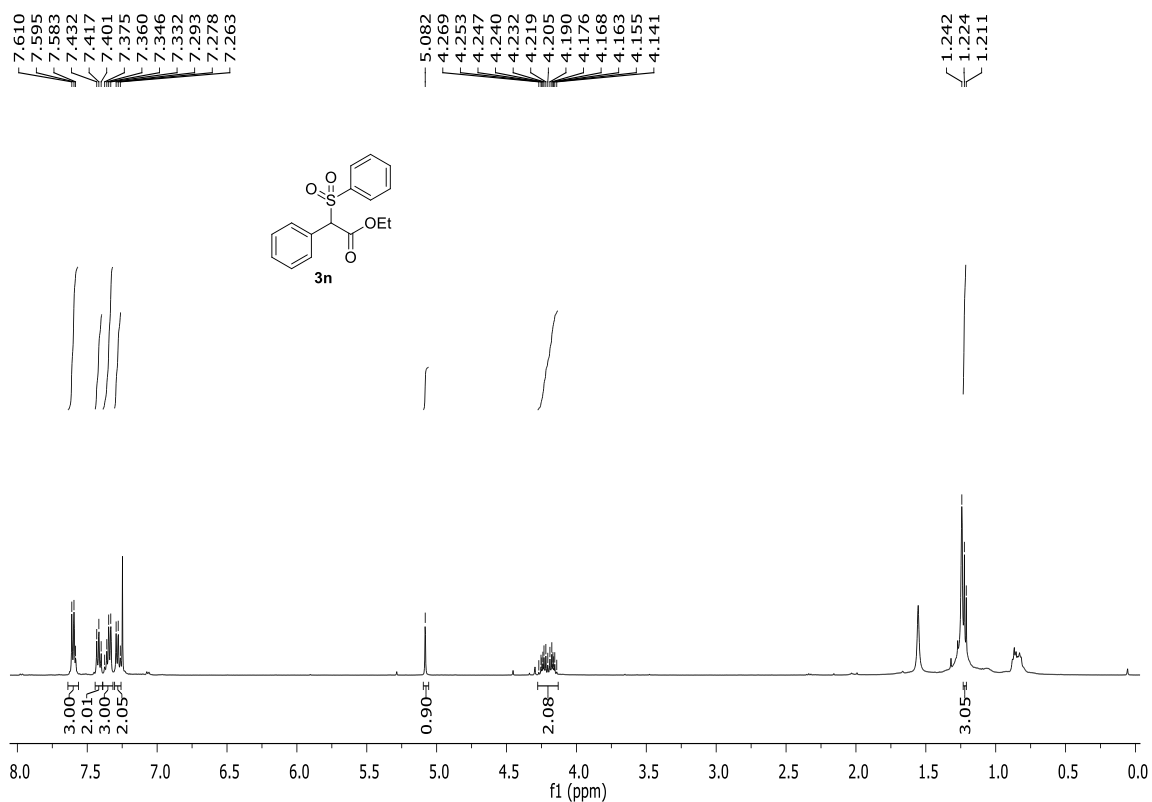

**$^{13}\text{C}\{^1\text{H}\}$  NMR (125 MHz,  $\text{CDCl}_3$ )**

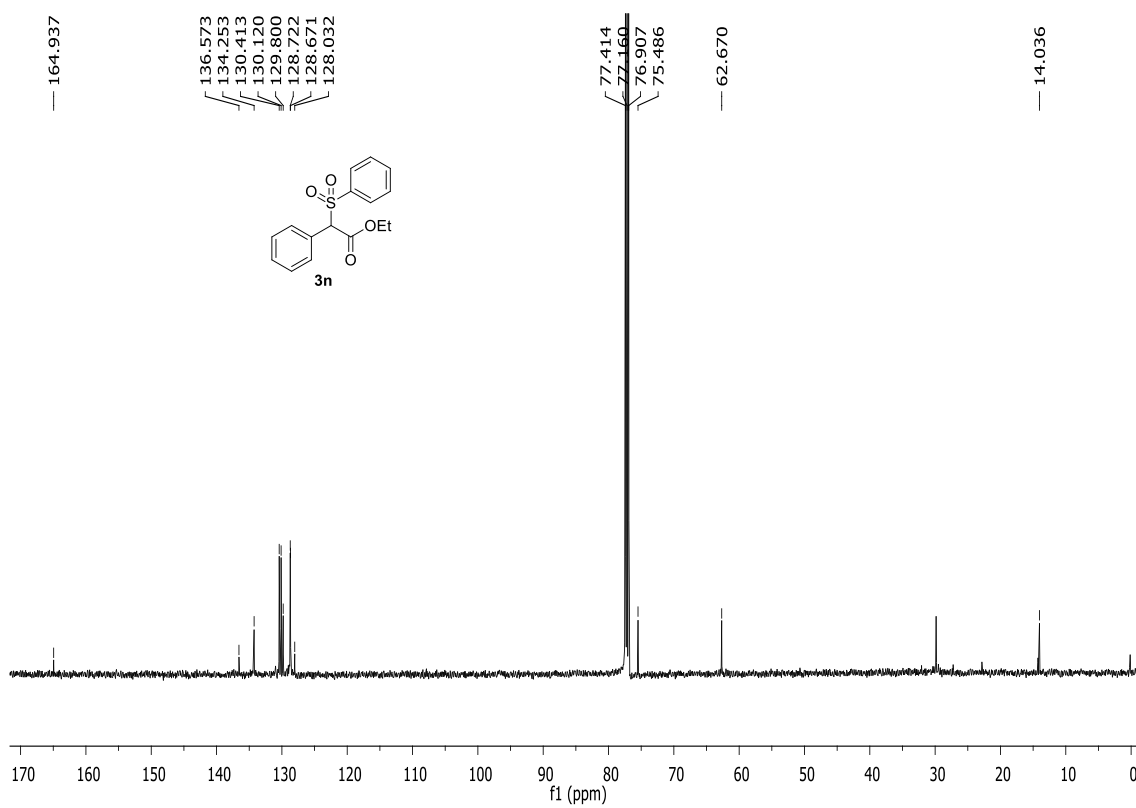



**$^1\text{H}$  NMR (500 MHz,  $\text{CDCl}_3$ )**

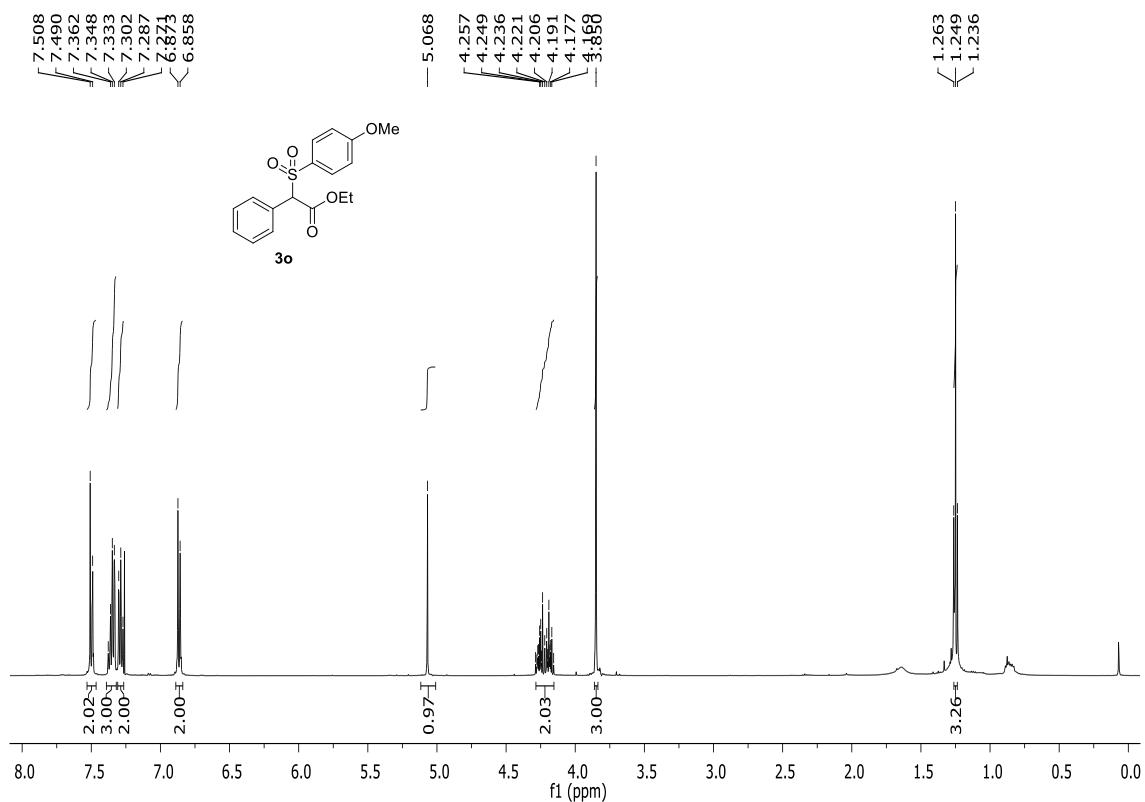

**$^{13}\text{C}\{^1\text{H}\}$  NMR (125 MHz,  $\text{CDCl}_3$ )**

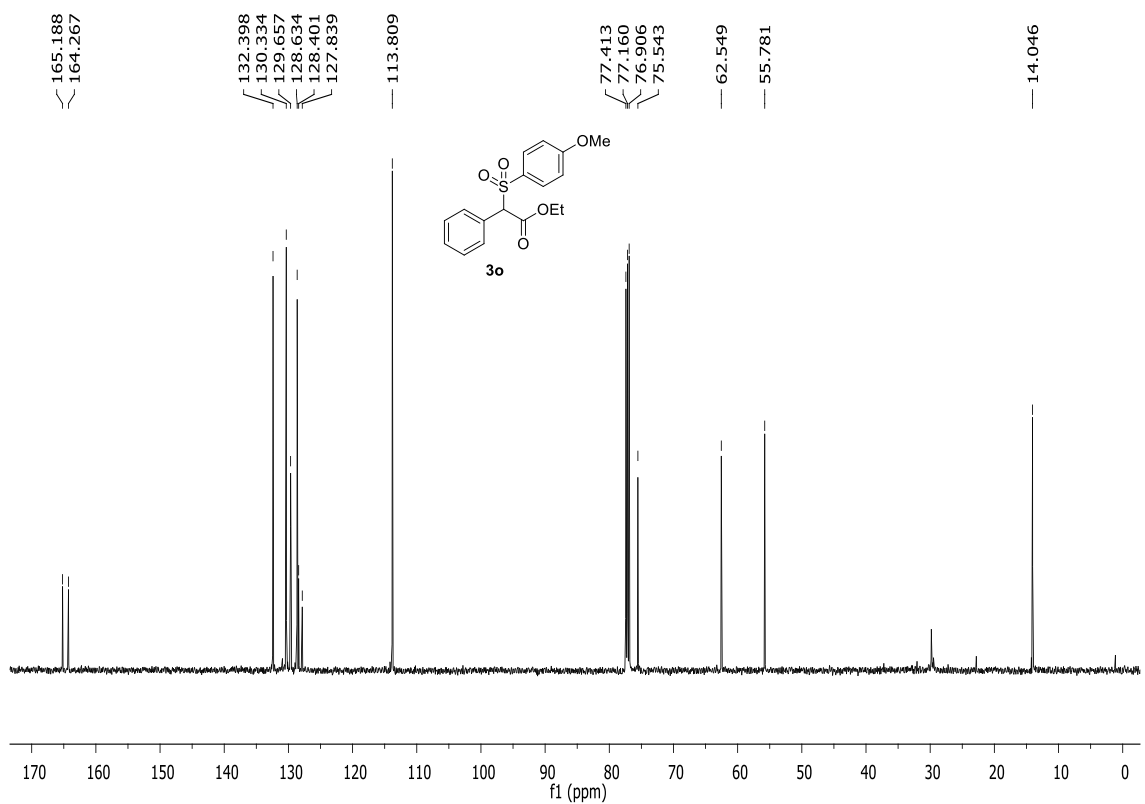

**<sup>1</sup>H NMR (500 MHz, CDCl<sub>3</sub>)**

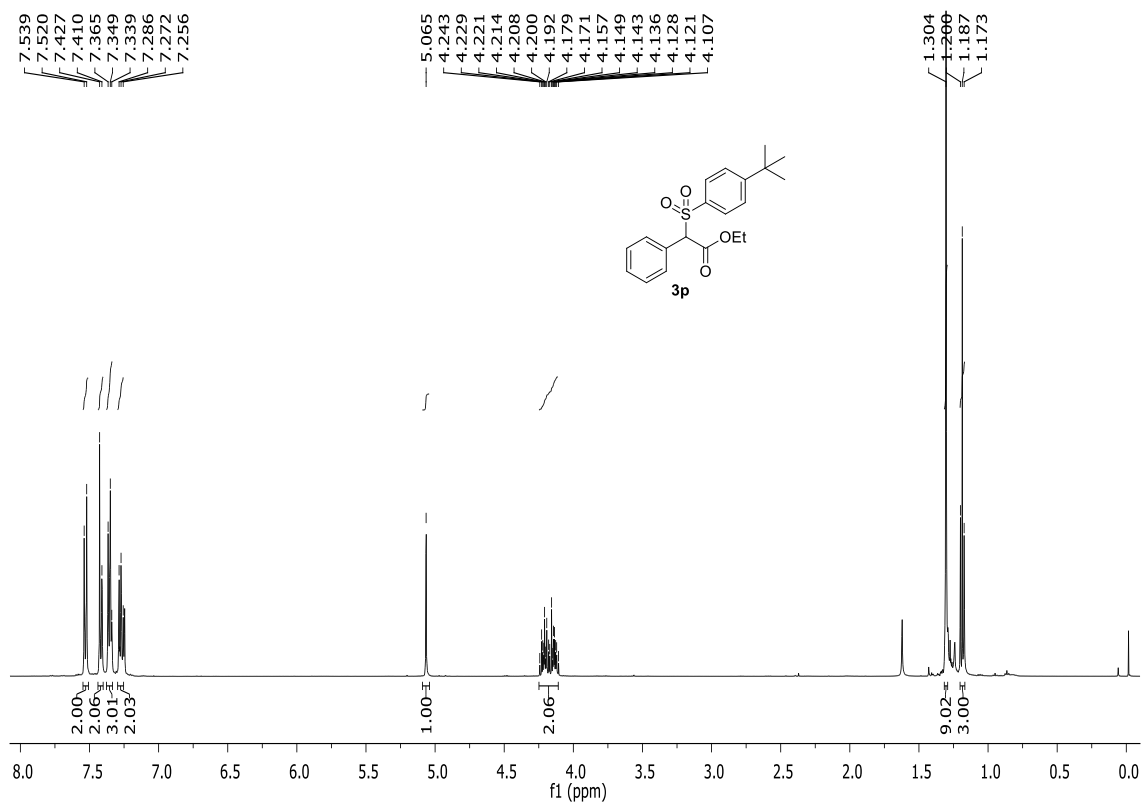

**<sup>13</sup>C{<sup>1</sup>H} NMR (125 MHz, CDCl<sub>3</sub>)**

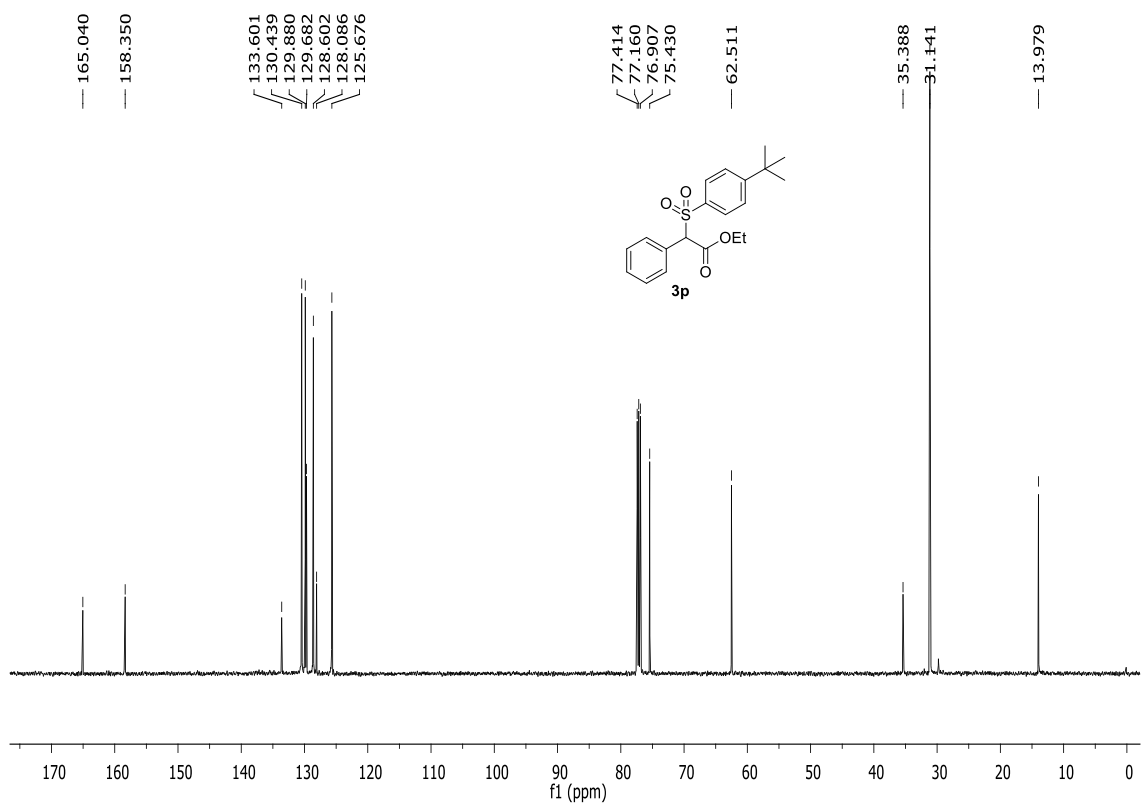

**<sup>1</sup>H NMR (500 MHz, CDCl<sub>3</sub>)**

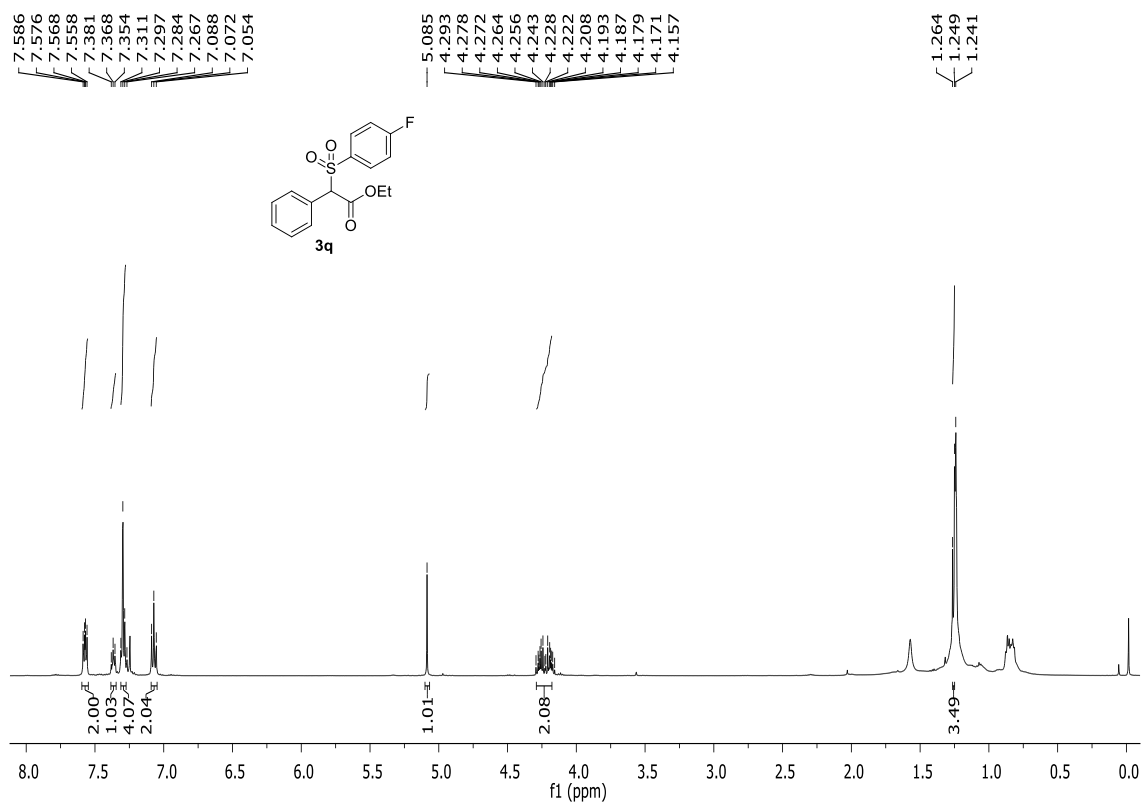

**<sup>13</sup>C{<sup>1</sup>H} NMR (125 MHz, CDCl<sub>3</sub>)**

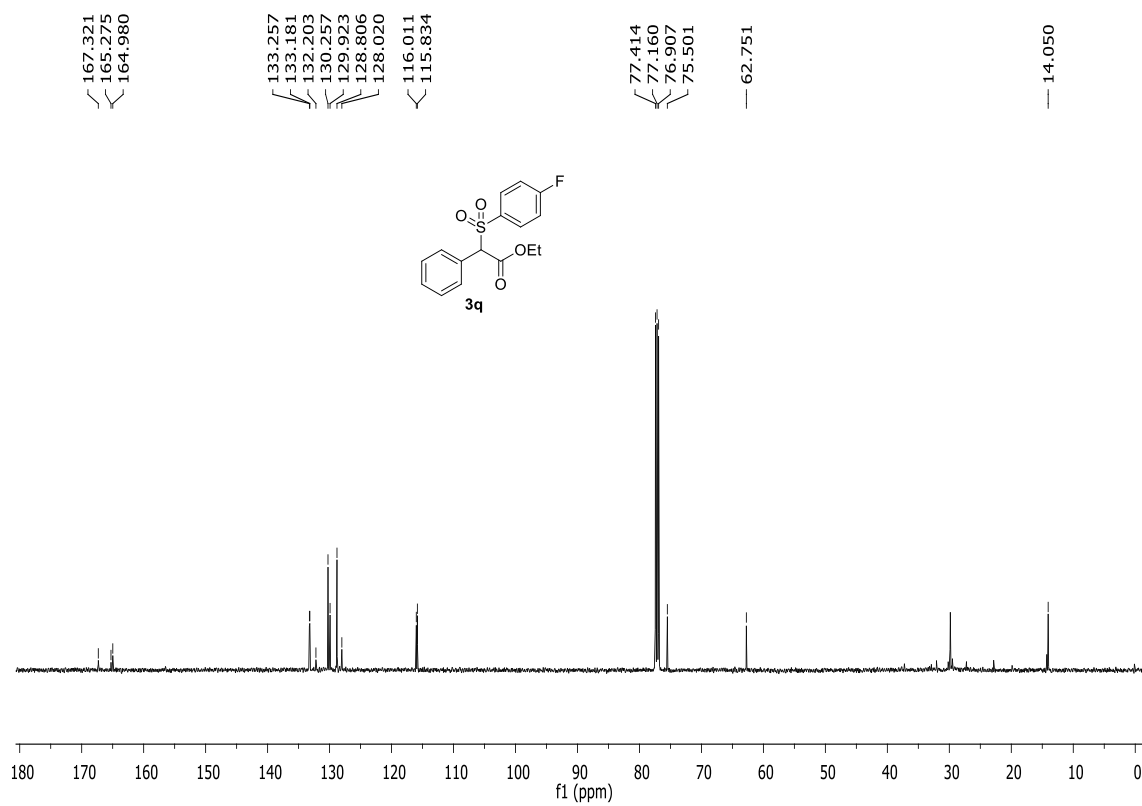

**$^{19}\text{F}$  NMR (470 MHz,  $\text{CDCl}_3$ )**

— -102.430

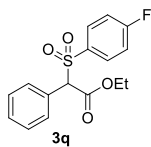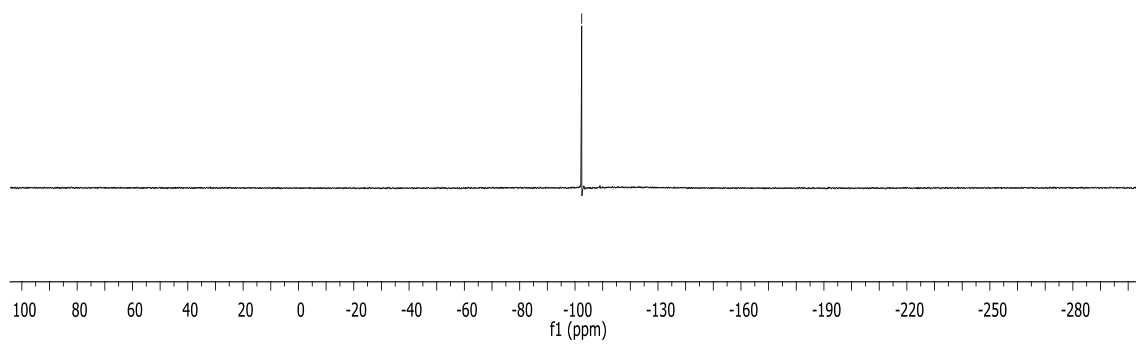

**$^1\text{H}$  NMR (500 MHz,  $\text{CDCl}_3$ )**

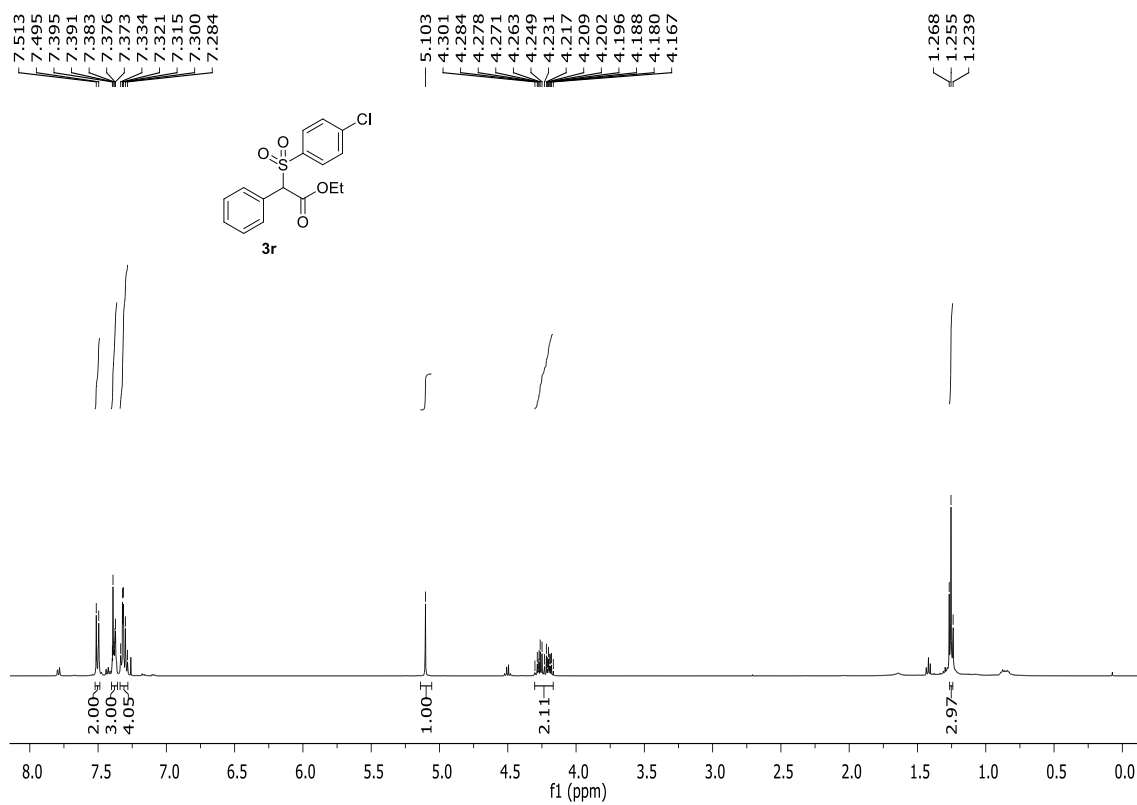

**$^{13}\text{C}\{^1\text{H}\}$  NMR (125 MHz,  $\text{CDCl}_3$ )**

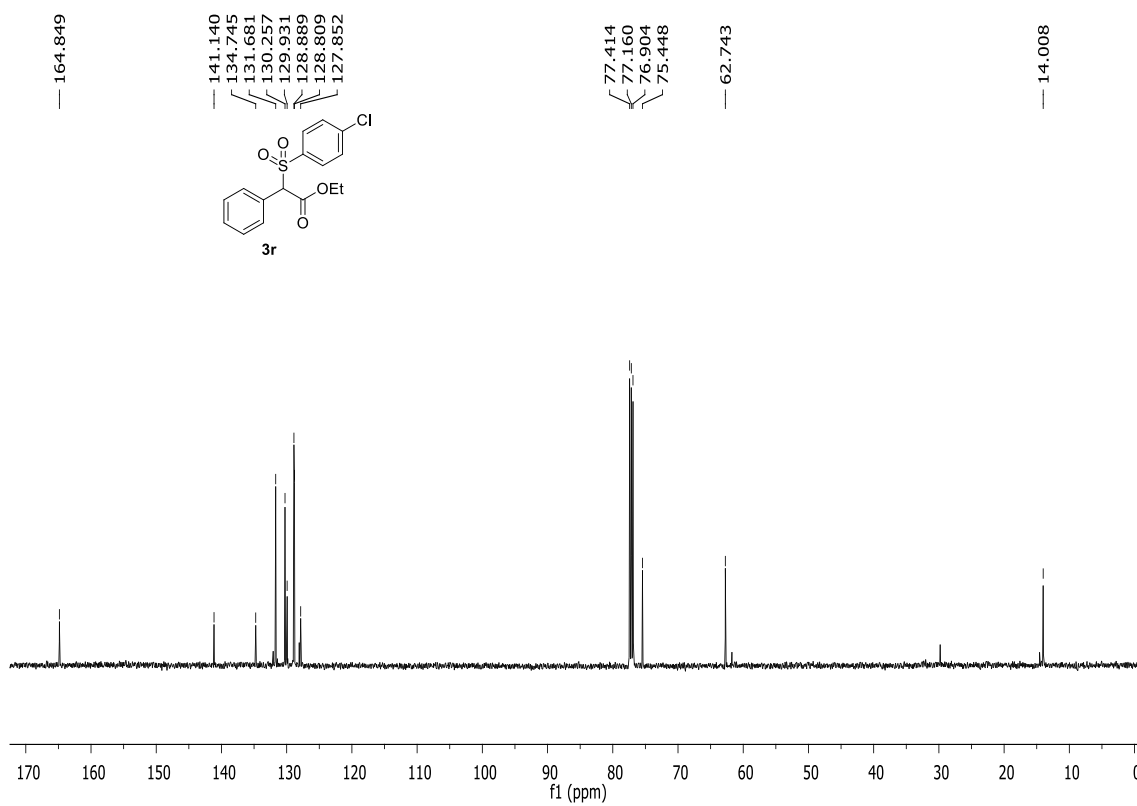

**$^1\text{H}$  NMR (500 MHz,  $\text{CDCl}_3$ )**

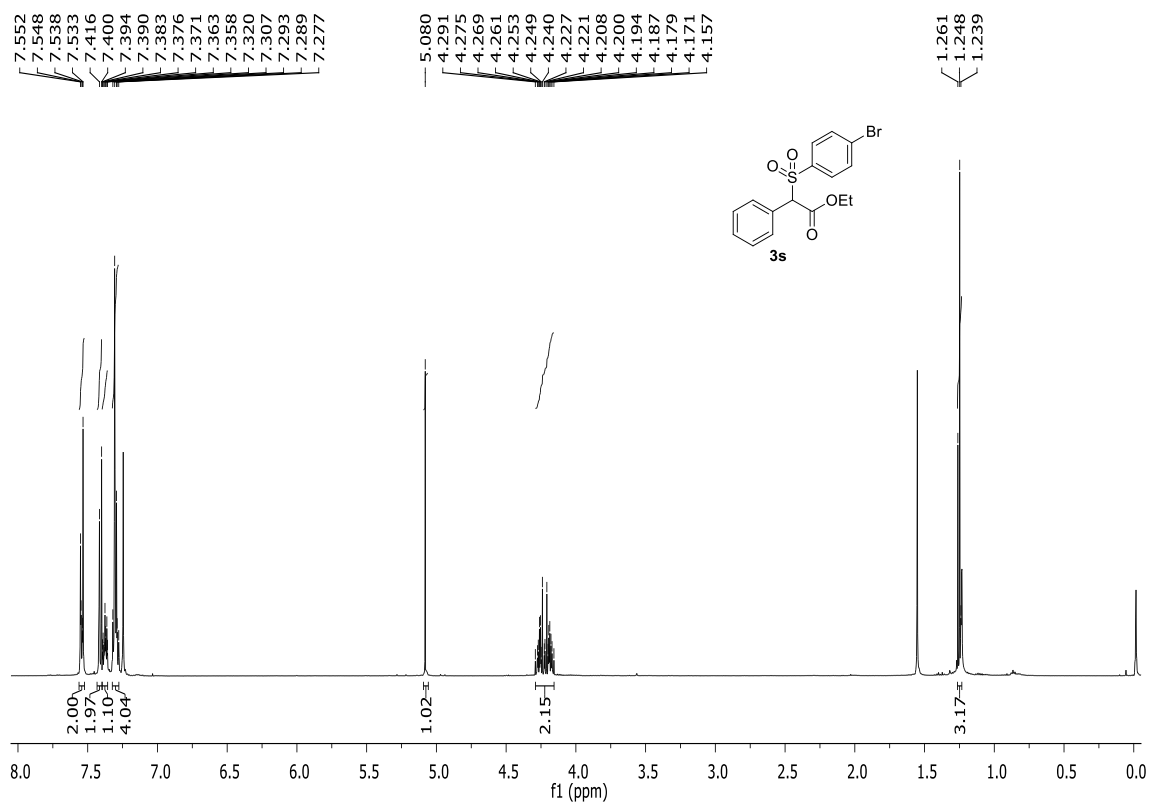

**$^{13}\text{C}\{^1\text{H}\}$  NMR (125 MHz,  $\text{CDCl}_3$ )**

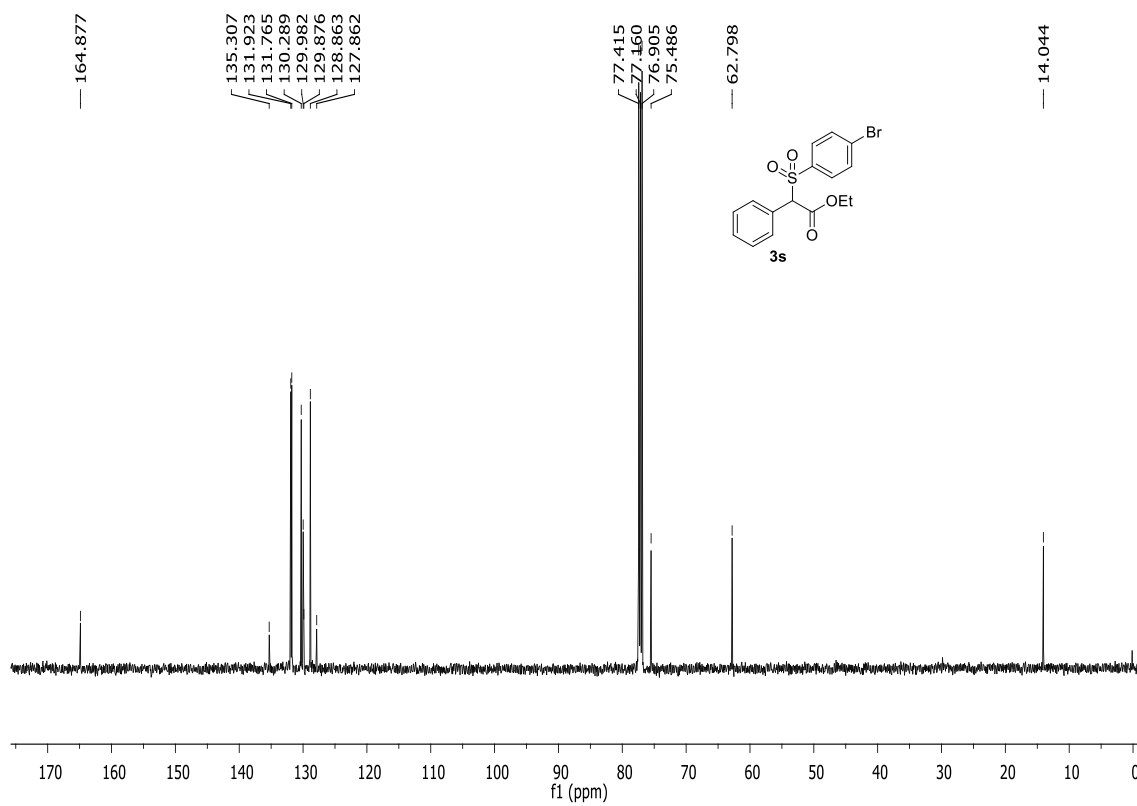

**$^1\text{H}$  NMR (500 MHz,  $\text{CDCl}_3$ )**

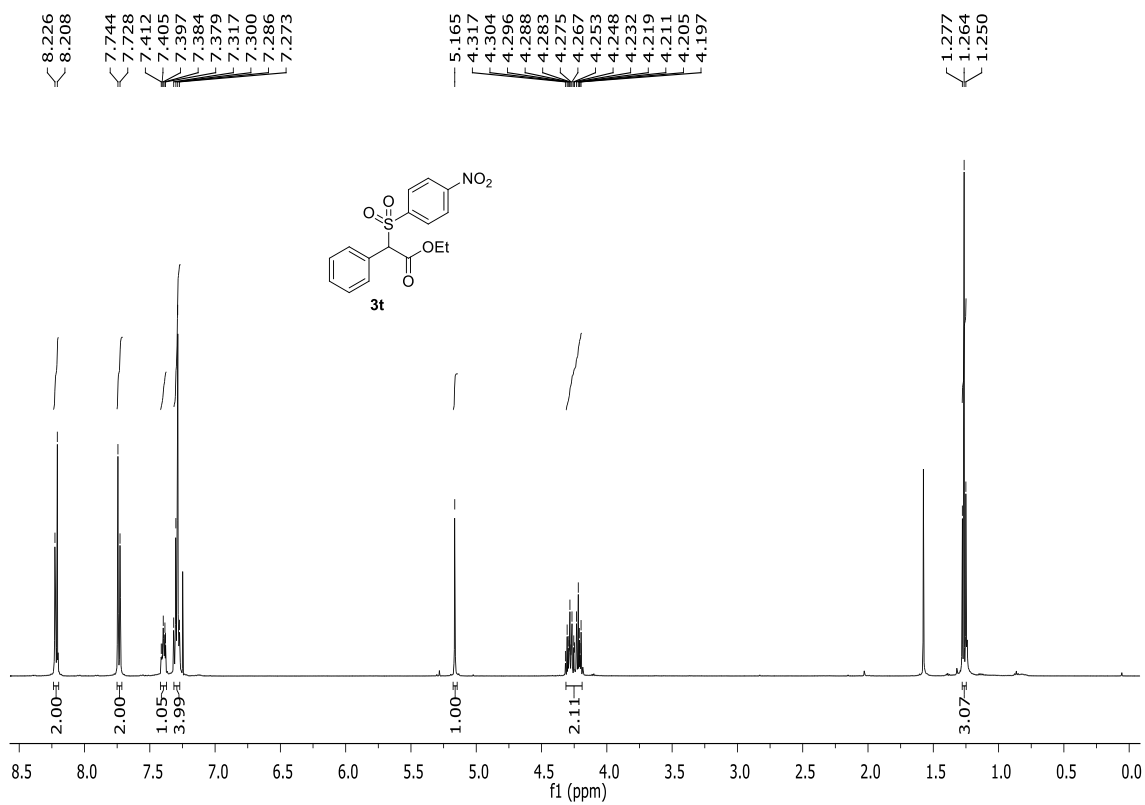

**$^{13}\text{C}\{^1\text{H}\}$  NMR (125 MHz,  $\text{CDCl}_3$ )**

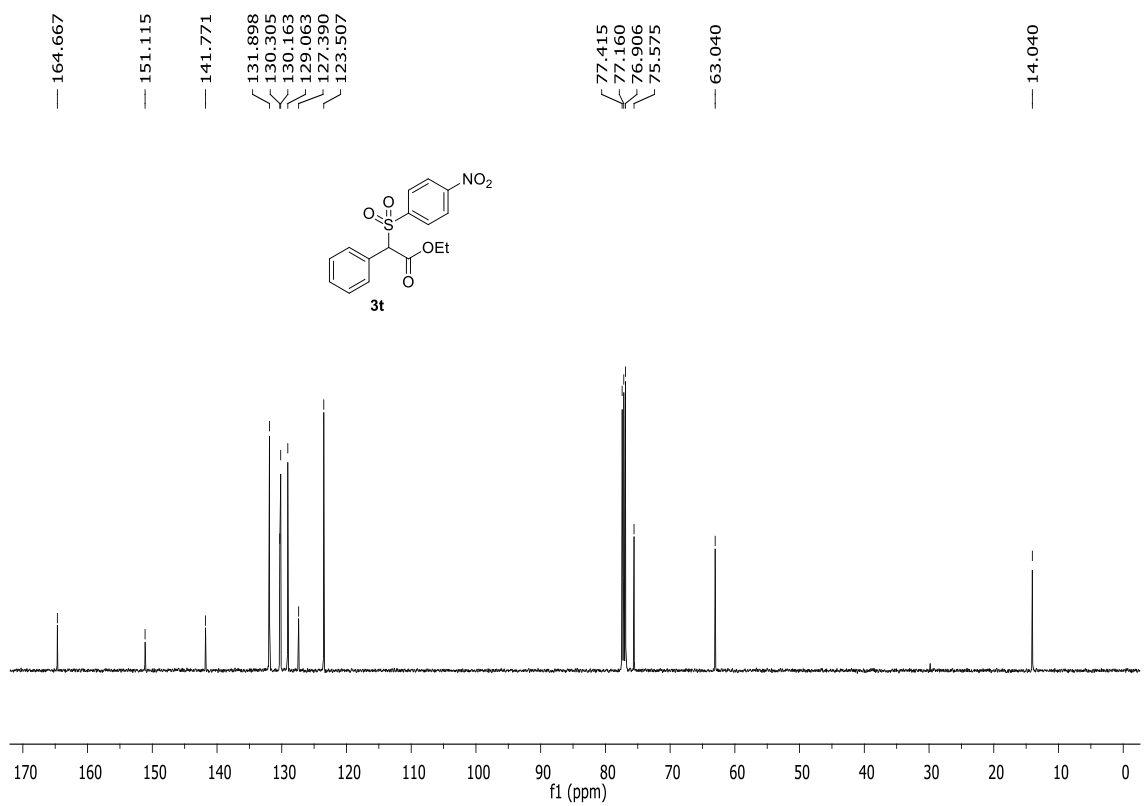

**<sup>1</sup>H NMR (500 MHz, CDCl<sub>3</sub>)**

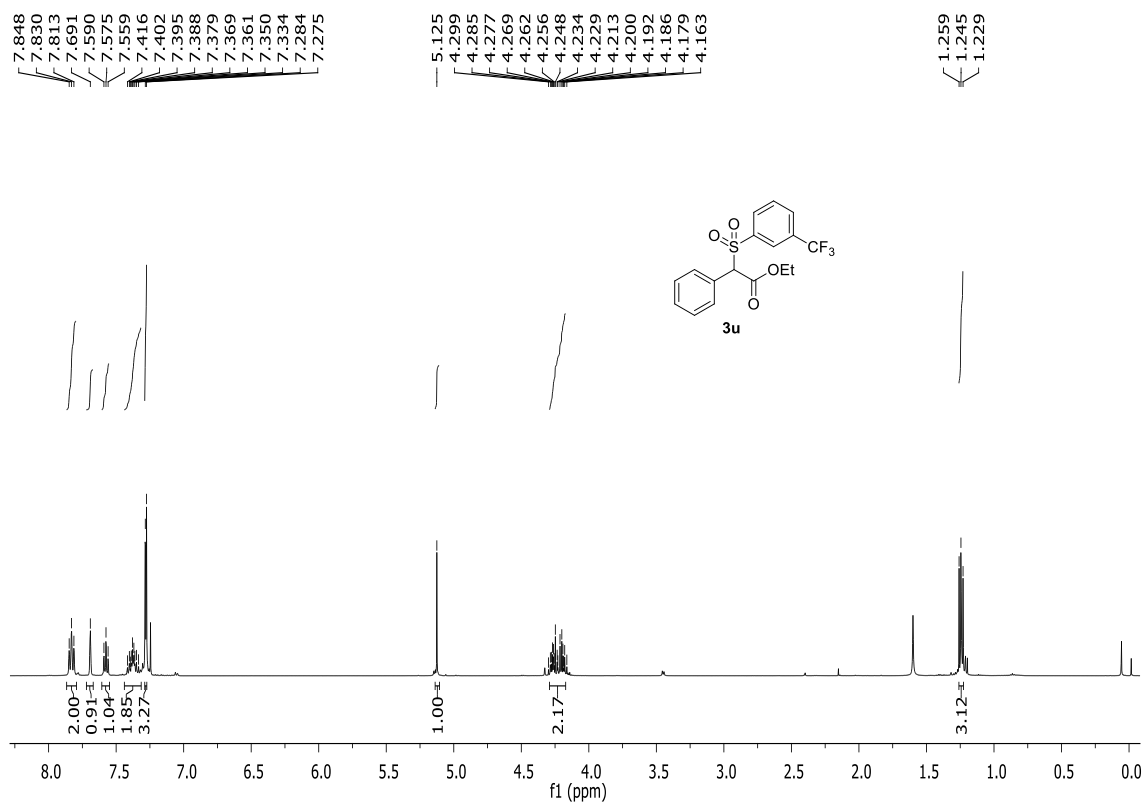

**<sup>13</sup>C{<sup>1</sup>H} NMR (125 MHz, CDCl<sub>3</sub>)**

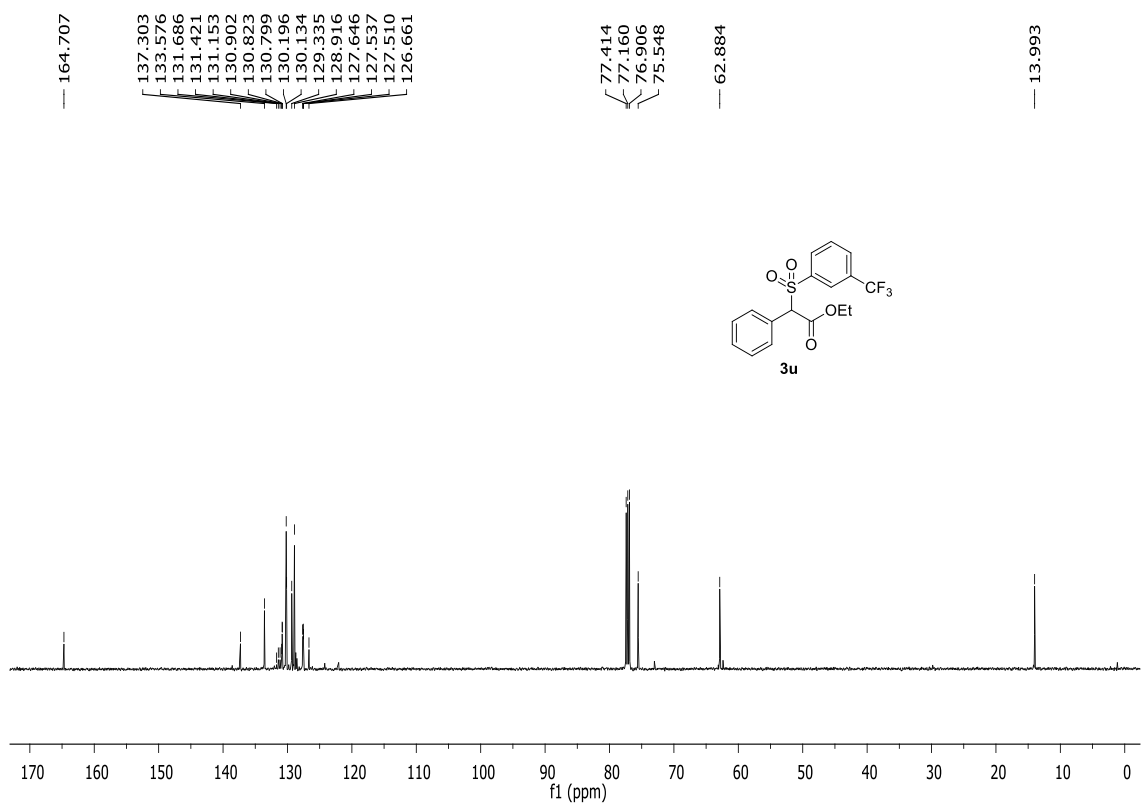



**<sup>19</sup>F NMR (470 MHz, CDCl<sub>3</sub>)**

--- -62.846

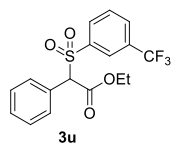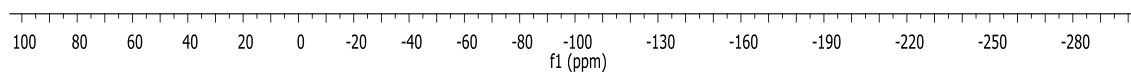

**<sup>1</sup>H NMR (500 MHz, CDCl<sub>3</sub>)**

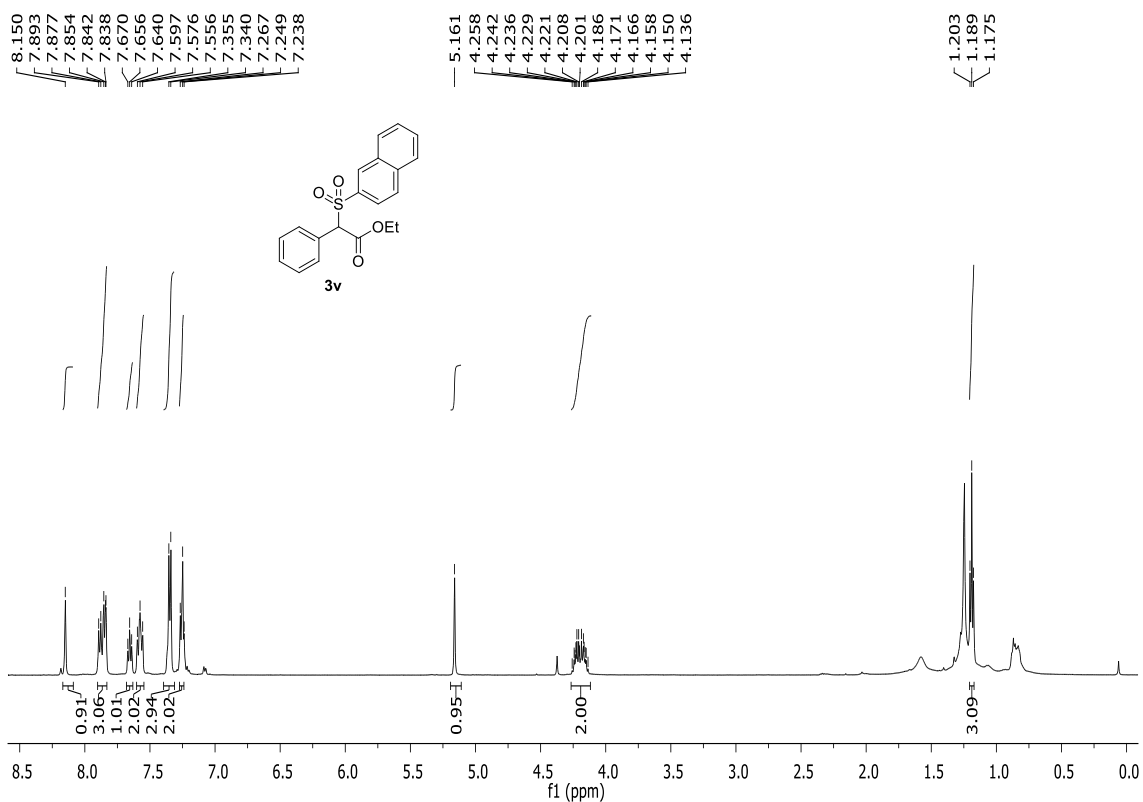

**<sup>13</sup>C{<sup>1</sup>H} NMR (125 MHz, CDCl<sub>3</sub>)**

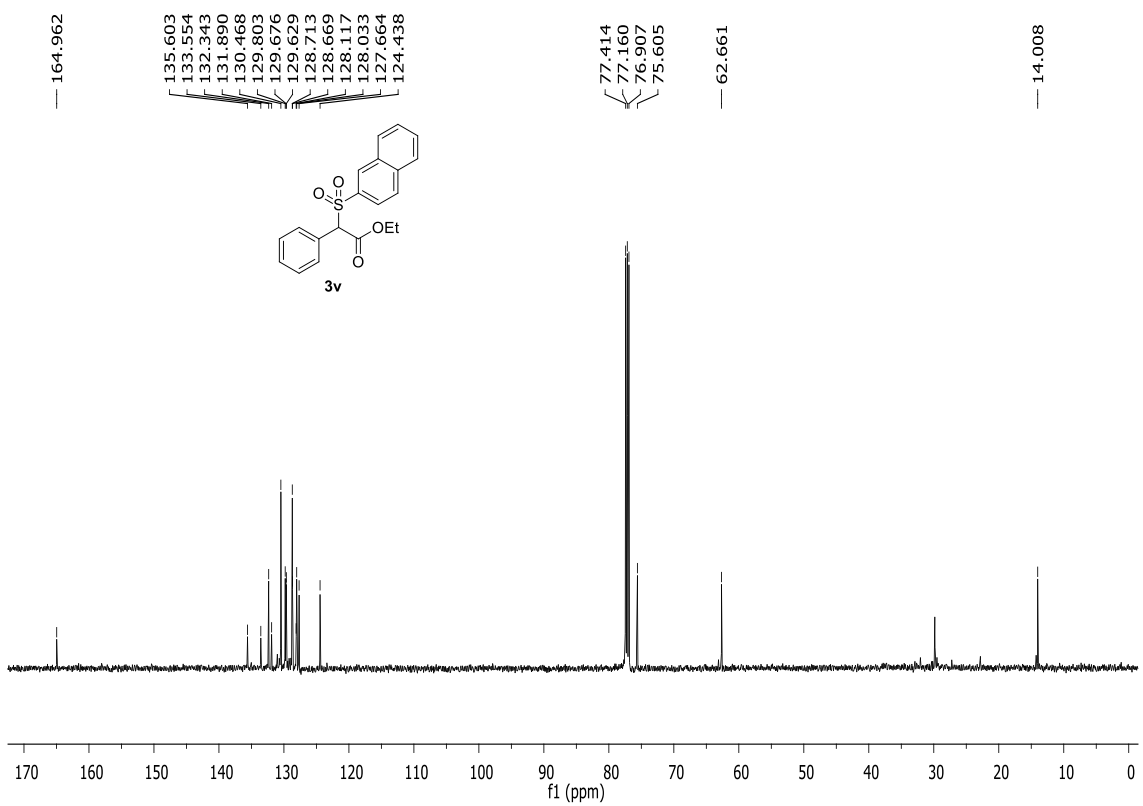

**$^1\text{H}$  NMR (500 MHz,  $\text{CDCl}_3$ )**

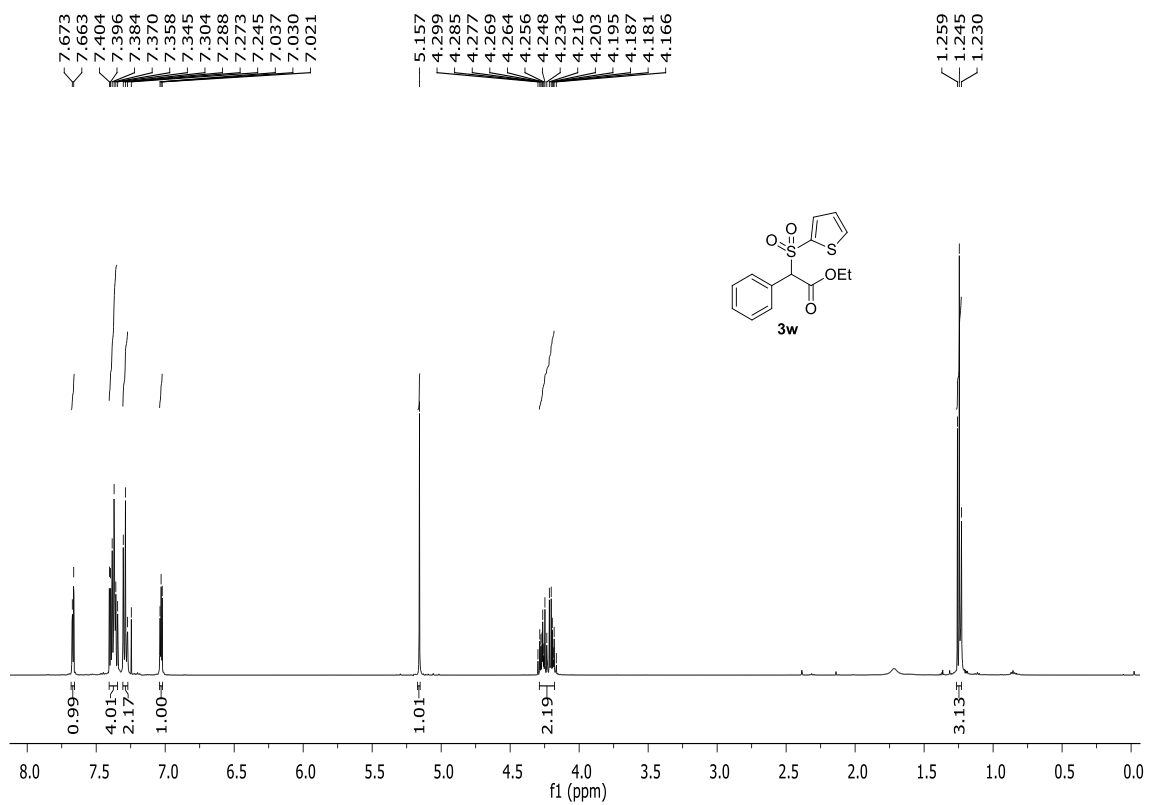

**$^{13}\text{C}\{^1\text{H}\}$  NMR (125 MHz,  $\text{CDCl}_3$ )**

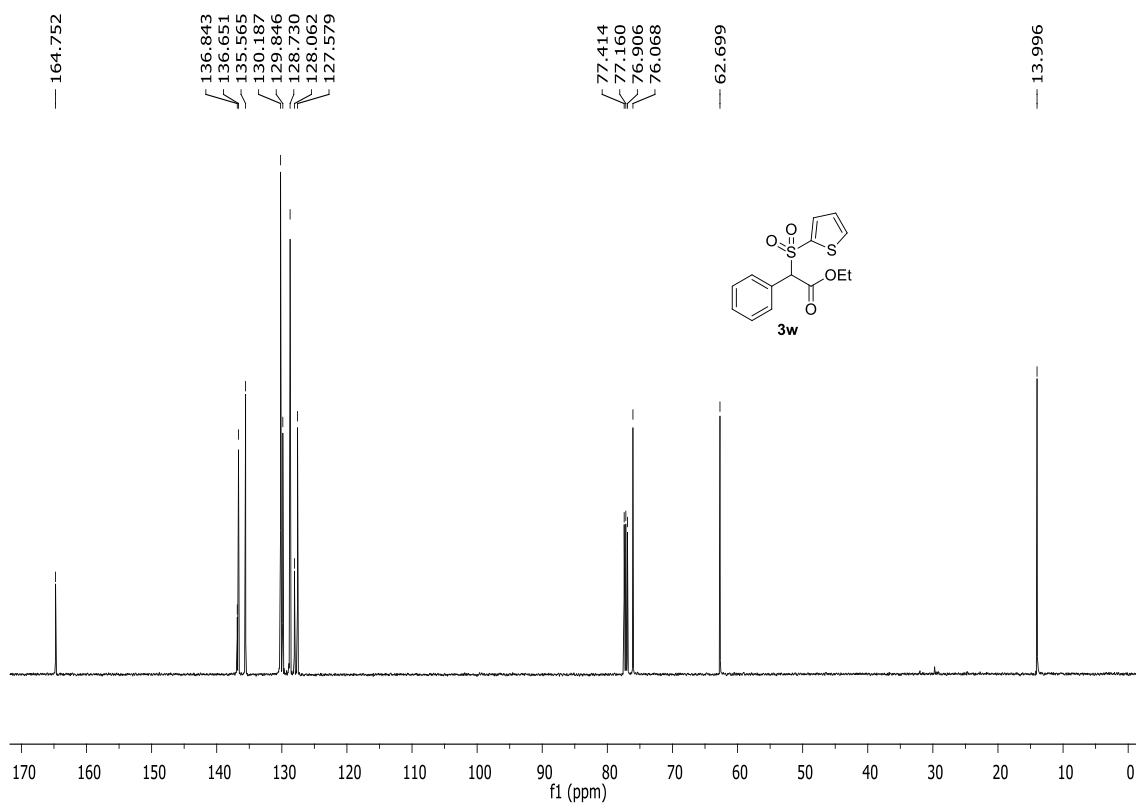

**<sup>1</sup>H NMR (500 MHz, CDCl<sub>3</sub>)**

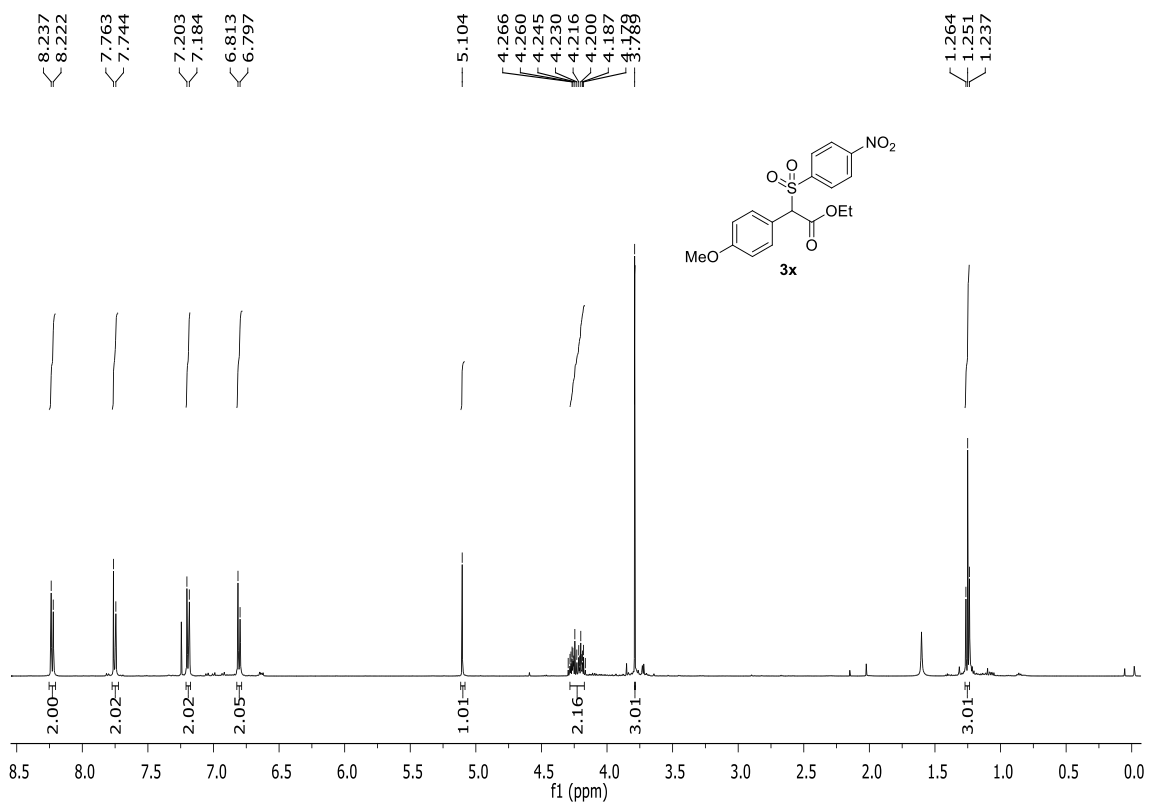

**<sup>13</sup>C{<sup>1</sup>H} NMR (125 MHz, CDCl<sub>3</sub>)**

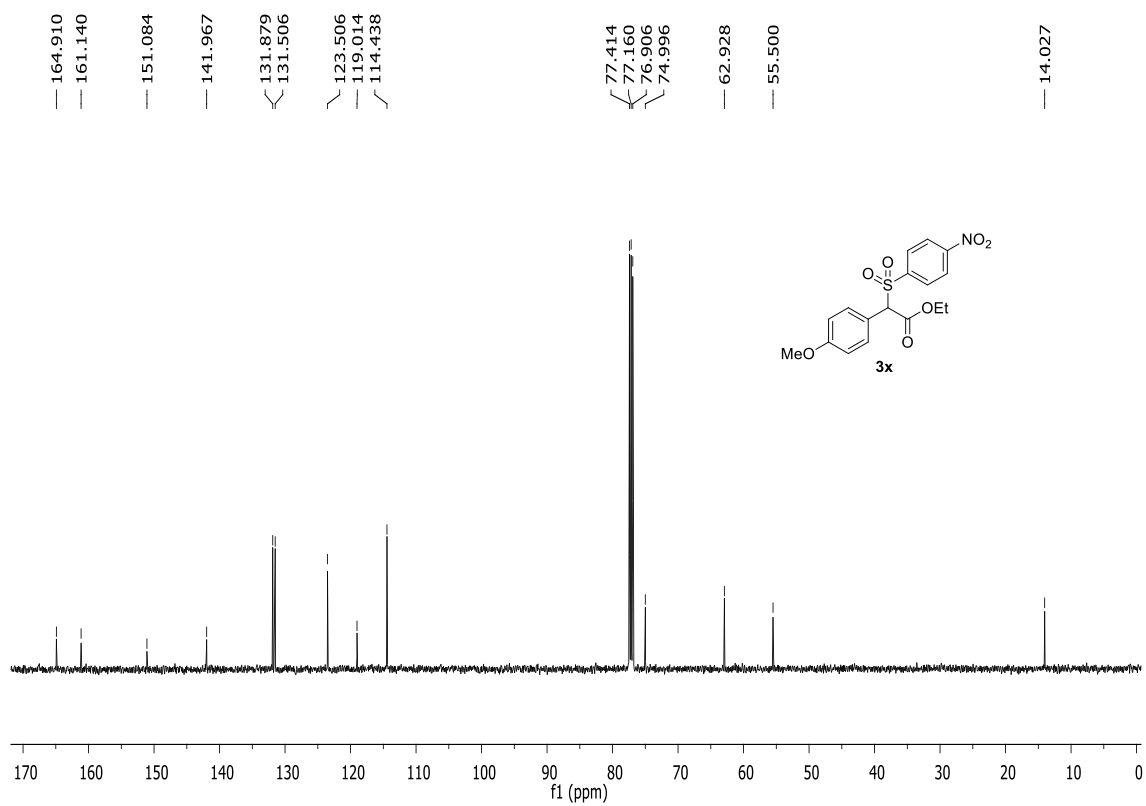

## II. HRMS of the TEMPO adduct 4a

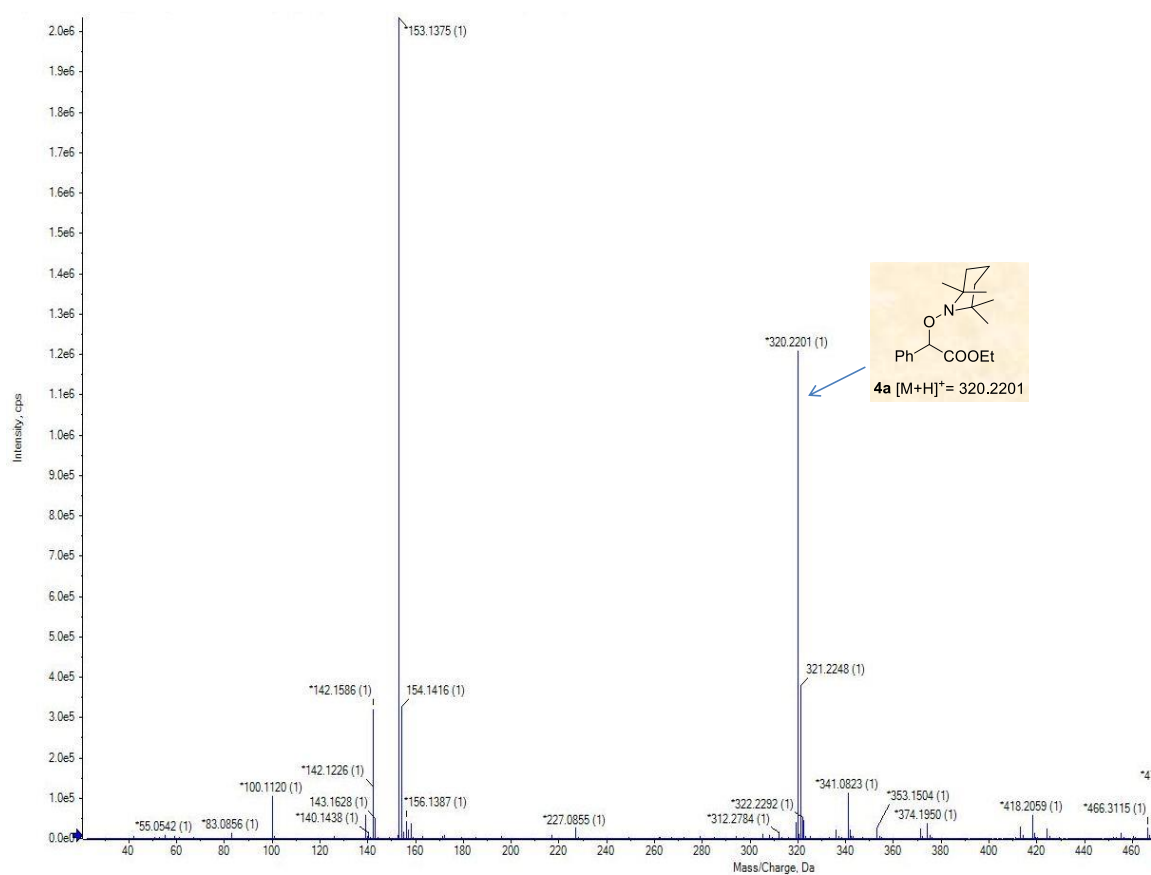

Supplement: d2ob02219b1.pdf [file d2ob02219b1.pdf]
